# Supplementary material
Source: publisher site journal article supplement (https://www.dovepress.com/get_supplementary_file.php?f=395854.xlsx)
Supplement: Supplementary file 1 [file get_supplementary_file.php]

## Sheet: Sheet1
gene_name	log2FoldChange	pvalue	padj
TSPAN6	-0.0548483	0.480243	0.59143
TNMD	0.905763	0.0021106	0.00559234
DPM1	0.12704	0.0109892	0.0243859
SCYL3	0.0950454	0.0433285	0.0810396
C1orf112	-0.0938968	0.119736	0.193282
FGR	0.312895	0.0183777	0.038392
CFH	1.75991	2.18346e-42	4.12195e-39
FUCA2	-0.175971	0.00600752	0.0142457
GCLC	-0.0549977	0.348081	0.461284
NFYA	-0.110972	0.0798674	0.13673
STPG1	-0.217037	0.00667992	0.0156614
NIPAL3	0.256136	0.0103623	0.0231596
LAS1L	-0.174792	9.07783e-06	3.86803e-05
ENPP4	0.787627	8.13469e-07	4.14727e-06
SEMA3F	-0.246192	0.0213528	0.0437383
CFTR	-0.0891818	0.629744	0.72473
ANKIB1	0.351919	1.99483e-08	1.34062e-07
CYP51A1	-0.0754505	0.446725	0.559574
KRIT1	0.315262	2.46901e-07	1.38251e-06
RAD52	0.131236	0.0252803	0.0507448
MYH16	0.289136	0.0155259	0.0330849
BAD	-0.372969	1.33111e-07	7.79591e-07
LAP3	0.625387	4.7535e-16	1.0689e-14
CD99	-0.47301	5.88296e-10	5.05909e-09
HS3ST1	0.695609	2.83622e-08	1.86188e-07
AOC1	-0.371073	0.0151686	0.0324014
WNT16	1.90202	8.98762e-22	5.06115e-20
HECW1	-0.0752342	0.743285	0.816634
MAD1L1	-0.949489	1.29477e-23	9.92839e-22
LASP1	-0.254765	2.35494e-06	1.10497e-05
SNX11	-0.270029	8.23533e-09	5.90382e-08
TMEM176A	0.408988	0.00159152	0.0043334
M6PR	-0.222417	0.000312724	0.000993321
KLHL13	0.747503	9.37485e-05	0.000330361
CYP26B1	-0.023316	0.856966	0.900201
ICA1	0.10578	0.344114	0.457112
DBNDD1	-0.605995	6.47034e-09	4.71266e-08
ALS2	0.0323184	0.498138	0.608142
CASP10	0.620915	1.51792e-10	1.42733e-09
CFLAR	0.505518	1.04197e-20	4.91175e-19
TFPI	1.33008	6.68393e-28	1.05569e-25
NDUFAF7	0.138061	0.0020676	0.00548794
RBM5	0.112245	0.0120665	0.0264703
MTMR7	0.671164	6.95583e-13	9.45669e-12
SLC7A2	-0.406049	0.0106622	0.0237642
ARF5	-0.45396	1.171e-12	1.54486e-11
SARM1	-0.332237	8.56192e-05	0.000304202
POLDIP2	-0.564097	1.14764e-31	3.47305e-29
PLXND1	-0.199535	0.0295976	0.0582432
AK2	-0.285801	1.98978e-08	1.3379e-07
CD38	1.58523	6.59132e-22	3.81469e-20
FKBP4	-0.653344	8.86085e-21	4.21198e-19
KDM1A	-0.331452	3.74839e-06	1.69995e-05
RBM6	0.245705	3.36238e-06	1.53676e-05
CAMKK1	-0.505758	6.03383e-10	5.17984e-09
RECQL	0.516455	8.84223e-11	8.64467e-10
VPS50	0.284276	1.8022e-06	8.65388e-06
HSPB6	-0.691271	9.84462e-05	0.000345656
ARHGAP33	0.115339	0.150724	0.234472
NDUFAB1	-0.131781	0.00109351	0.00308746
PDK4	0.0972033	0.586117	0.68711
SLC22A16	0.868781	3.13667e-08	2.04187e-07
ZMYND10	-0.370673	0.00154906	0.00422708
ABCB5	-0.582382	0.00917806	0.0208
ARX	-0.943209	7.07537e-05	0.000255903
SLC25A13	-0.407509	8.11134e-09	5.81915e-08
ST7	-0.533561	2.94038e-12	3.63822e-11
CDC27	0.189235	0.000299117	0.000953845
SLC4A1	0.514801	0.0100128	0.0224531
CALCR	0.58959	0.00176714	0.00476606
HCCS	-0.0547381	0.195434	0.290625
DVL2	-0.446542	9.17103e-18	2.69715e-16
PRSS22	-0.12702	0.605326	0.703678
UPF1	-0.239117	9.08316e-08	5.4817e-07
SKAP2	0.536048	1.88915e-09	1.50177e-08
SLC25A5	-0.266381	1.03096e-05	4.34338e-05
MCUB	0.881083	3.46132e-17	9.3284e-16
HOXA11	-0.503887	0.000551706	0.00166757
POLR2J	-0.32275	5.79188e-06	2.55268e-05
DHX33	-0.267924	4.52392e-05	0.000169243
MEOX1	0.447383	0.00826315	0.018964
THSD7A	1.24491	2.48119e-18	7.939e-17
LIG3	-0.404775	3.68165e-15	7.16874e-14
RPAP3	0.412841	1.31936e-11	1.46307e-10
ACSM3	0.972479	1.35336e-12	1.76896e-11
REXO5	0.0228909	0.742491	0.816022
CIAPIN1	-0.300183	1.8195e-10	1.6877e-09
SPPL2B	-0.0634953	0.358858	0.472612
FAM214B	-0.301512	1.08252e-05	4.54364e-05
COPZ2	-0.193253	0.0896052	0.151181
PRKAR2B	1.02802	4.38869e-20	1.85683e-18
MSL3	0.49266	1.39681e-23	1.06902e-21
CREBBP	-0.212372	4.97466e-06	2.21815e-05
TSPOAP1	0.734047	1.32334e-06	6.50901e-06
MPO	0.118169	0.441953	0.555
PON1	0.301111	0.123127	0.197781
GCFC2	0.210057	0.000497599	0.00151593
WDR54	-0.446514	3.76126e-08	2.41828e-07
CROT	0.056438	0.428829	0.542679
ABCB4	-0.154833	0.344284	0.457262
KMT2E	0.378395	3.14821e-12	3.87e-11
RHBDD2	-0.485259	2.43962e-10	2.22541e-09
SOX8	0.0964472	0.58485	0.68603
IBTK	0.389215	1.76981e-08	1.19997e-07
ZNF195	0.330872	3.30814e-06	1.51296e-05
MYCBP2	0.152881	0.0207489	0.0426688
FBXL3	0.571639	3.95039e-17	1.05603e-15
ITGAL	0.918264	1.56948e-08	1.07425e-07
PDK2	-0.622123	2.91198e-15	5.78079e-14
ITGA3	-0.167791	0.229135	0.330325
ZFX	0.440261	1.37316e-14	2.461e-13
LAMP2	0.0204896	0.744615	0.817466
ITGA2B	0.0270643	0.853239	0.897447
ASB4	0.310967	0.253094	0.357719
GDE1	-0.0282187	0.50892	0.617975
REX1BD	-0.321742	6.33958e-05	0.000231041
CRLF1	-0.198961	0.149385	0.232731
OSBPL7	-0.167181	0.0213786	0.0437866
TMEM98	-0.310047	0.00512329	0.012371
YBX2	-1.05932	2.65174e-10	2.40397e-09
KRT33A	-0.934492	0.0336311	0.065049
MAP3K14	0.156806	0.0297867	0.0585775
ABCC8	1.13216	1.00774e-05	4.2569e-05
CACNG3	0.695046	0.00462324	0.0112887
TMEM132A	-0.157337	0.184751	0.277497
AP2B1	-0.19563	2.26024e-05	8.93635e-05
TAC1	0.22697	0.50927	0.618252
ZNF263	-0.187721	1.92655e-06	9.20525e-06
CX3CL1	-0.245633	0.0156987	0.0334104
SPATA20	-0.760528	3.02391e-20	1.31809e-18
CACNA1G	-0.0826332	0.592802	0.692899
TNFRSF12A	0.222183	0.0668953	0.117506
DLX6	-0.403626	0.0569306	0.102393
MAP3K9	-0.682026	7.45319e-09	5.37031e-08
RALA	0.170169	0.000535357	0.00162186
BAIAP2L1	-0.945216	8.55383e-11	8.38961e-10
KDM7A	0.709375	2.93164e-20	1.28139e-18
ETV1	0.70868	1.55124e-10	1.4544e-09
AGK	0.102907	0.0523993	0.0953292
ALDH3B1	-0.714585	1.5605e-10	1.46148e-09
TTC22	-0.216282	0.305741	0.416422
PHTF2	0.533882	5.75356e-14	9.36347e-13
CCL26	0.69962	4.78225e-06	2.1387e-05
FARP2	-0.237032	0.0021467	0.00567849
USH1C	0.899454	0.00698442	0.0163049
GGCT	-0.0579873	0.271527	0.378374
DBF4	0.357945	1.94123e-06	9.26983e-06
TBXA2R	0.281522	0.0470632	0.0869906
IFRD1	0.378511	6.11614e-07	3.19205e-06
LGALS14	0.769332	0.0420168	0.07897
COX10	-0.193739	3.0432e-05	0.000117404
GTF2IRD1	-0.43841	1.00996e-09	8.37987e-09
PAF1	-0.290595	5.60006e-12	6.60937e-11
VPS41	0.0446625	0.418335	0.532134
ARHGAP44	0.408274	4.02664e-05	0.000152031
ELAC2	-0.379719	6.23687e-15	1.17572e-13
SCIN	-0.639865	0.00374705	0.00936384
ARSD	-0.322779	2.33402e-05	9.20513e-05
PNPLA4	-0.394965	1.1106e-08	7.77616e-08
MYH13	0.418226	0.126561	0.202428
ADIPOR2	-0.362265	5.04946e-11	5.13943e-10
CDKL3	0.173822	0.0169852	0.035838
UPP2	0.544971	0.000903853	0.0026039
PRSS21	0.368627	0.189862	0.283916
MARK4	-0.5082	1.3596e-19	5.2999e-18
PROM1	-0.497108	0.00437867	0.0107638
CCDC124	-0.669884	2.28283e-20	1.0203e-18
CEACAM21	1.09743	2.00569e-14	3.50744e-13
PAFAH1B1	0.140252	0.00099673	0.00284051
NOS2	-0.710171	2.88779e-06	1.33462e-05
DNAH9	1.70611	1.01342e-11	1.14751e-10
KIAA0100	-0.340274	1.09851e-11	1.23614e-10
SLC13A2	0.724295	0.0473482	0.0874196
GAS7	0.175489	0.0892951	0.150747
TRAPPC6A	-0.809104	7.39753e-23	5.03032e-21
MATK	-0.45487	0.00445919	0.0109421
CEACAM7	-0.218271	0.529414	0.636967
CD79B	0.633553	0.00038849	0.00121041
SCN4A	-0.0655714	0.674728	0.762251
ST7L	0.0230846	0.632932	0.72743
TKTL1	-0.804146	0.00012562	0.000432523
PAX6	0.439986	5.66401e-05	0.000208336
RPUSD1	-0.617396	1.2938e-20	6.006e-19
RHBDF1	-0.196397	0.00804055	0.0184992
LUC7L	0.058704	0.39907	0.513093
CACNA2D2	-1.2834	9.13401e-14	1.43751e-12
BAIAP3	0.208695	0.156103	0.241571
TSR3	-0.539599	4.44334e-21	2.22134e-19
PIGQ	-0.564631	1.19197e-17	3.45427e-16
CRAMP1	-0.0191086	0.662646	0.752332
TEAD3	-0.563292	5.76724e-09	4.23279e-08
SELE	0.895412	7.05482e-08	4.34153e-07
DNAJC11	-0.434893	1.17642e-17	3.41669e-16
FMO3	0.429461	0.00240051	0.00627868
MYLIP	-0.0583762	0.466197	0.578012
NOX1	0.226744	0.00191901	0.00513585
E2F2	-0.405518	4.20775e-07	2.26278e-06
PSMB1	-0.06251	0.24256	0.345889
SYN1	0.229425	0.0545172	0.0986345
JARID2	-0.389093	5.27813e-09	3.90385e-08
CDKL5	0.283054	0.000489117	0.00149193
CAMK1G	-1.75219	4.01199e-22	2.39535e-20
CDK11A	-0.0279107	0.665612	0.754705
NADK	-0.19279	4.33538e-05	0.000162665
TFAP2B	0.912507	0.010953	0.0243215
TFAP2D	-0.49239	0.289107
DLEC1	0.59035	6.53637e-07	3.39084e-06
CYTH3	-0.472635	2.99421e-07	1.65301e-06
ADAM22	0.661984	5.15089e-07	2.72451e-06
SYPL1	0.288826	1.6714e-08	1.13753e-07
CYB561	-0.161788	0.0251857	0.0505856
SPAG9	-0.0873041	0.149542	0.232944
CELSR3	-0.21576	0.100952	0.167306
AASS	0.211894	0.00894658	0.0203289
PLEKHG6	-1.38172	1.16116e-14	2.10389e-13
SS18L2	-0.0224037	0.665538	0.754665
MPND	-0.518371	4.09746e-14	6.83094e-13
MGST1	-0.376911	0.0692388	0.121017
CRY1	0.0706534	0.258508	0.364021
PGLYRP1	0.184194	0.202588	0.299332
NFIX	-0.109098	0.242223	0.345533
ST3GAL1	0.149041	0.0953042	0.159464
MMP25	0.0593643	0.675996	0.763287
IL32	0.602951	4.89123e-05	0.0001818
PKD1	-0.0200713	0.739396	0.813493
MAPK8IP2	-0.898129	1.7596e-07	1.00937e-06
MED24	-0.551407	2.13038e-27	3.09365e-25
RHOBTB2	-0.297708	7.65328e-07	3.92201e-06
HEATR5B	0.0201933	0.630531	0.725427
SEC62	0.432292	1.85205e-14	3.2531e-13
RPS20	-0.172563	0.0157225	0.033455
CSDE1	0.126723	0.0240551	0.0486031
UBE3C	0.141118	0.00610977	0.0144598
REV3L	0.219114	0.0212217	0.0435101
TENM1	1.2546	4.8185e-09	3.58732e-08
PAX7	-0.170172	0.614828	0.711779
MASP2	0.380489	0.000586541	0.00176118
IYD	0.201692	0.470745	0.582248
FAM76A	0.16399	0.00284337	0.00731206
TRAF3IP3	1.55965	4.57312e-25	4.54378e-23
POMT2	-0.423667	4.90039e-14	8.06103e-13
VTA1	0.135457	0.0109643	0.0243393
MLXIPL	1.29071	3.62366e-13	5.1416e-12
BAZ1B	0.140419	0.00432064	0.0106365
RANBP9	0.103876	0.0371779	0.0709894
ETV7	0.698536	1.31712e-05	5.44824e-05
SPRTN	0.0658976	0.173256	0.263284
EEF1AKNMT	-0.439227	8.46114e-18	2.50885e-16
DYRK4	-0.0845739	0.118314	0.191345
ZNF207	0.0349979	0.217482	0.31687
UQCRC1	-0.694995	5.90485e-27	7.96231e-25
STARD3NL	0.142623	0.00502669	0.0121578
CD9	0.269983	0.0154423	0.0329279
HHATL	0.900139	0.00730764	0.0169666
NCAPD2	-0.125063	0.0246155	0.0495737
IFFO1	-0.0323199	0.620835	0.717036
GIPR	0.714665	7.15678e-08	4.40291e-07
PHF7	-0.219036	0.000436133	0.00134448
SEMA3G	0.057149	0.642527	0.735939
NISCH	-0.0414646	0.432782	0.546268
STAB1	0.649028	7.13951e-11	7.09904e-10
FUZ	-0.372248	4.12091e-09	3.10234e-08
SLC6A13	0.0455461	0.788765	0.850187
IDS	0.442261	2.48017e-11	2.63461e-10
PRSS3	0.340154	0.266967	0.373413
ZNF200	0.175599	0.000247845	0.000805109
CD4	0.531085	3.36925e-05	0.000128979
LRRC23	-0.292872	1.48559e-05	6.08167e-05
BTK	0.876116	3.26614e-13	4.66773e-12
HFE	0.671819	1.06003e-07	6.31844e-07
SCMH1	-0.159012	0.00118413	0.00331603
FYN	-0.0430553	0.46246	0.574451
HIVEP2	0.367855	4.84275e-07	2.57561e-06
FMO1	0.0872093	0.596754	0.696593
ELOA	-0.160442	0.000925331	0.0026594
LYPLA2	-0.541879	7.95475e-19	2.73274e-17
CLCN6	-0.221549	2.82608e-05	0.000109722
MRC2	0.787029	1.15524e-07	6.84271e-07
NME1-NME2	-0.39154	7.55777e-05	0.000271567
SLC6A7	0.314788	0.0659233	0.116056
TSPAN9	-0.260126	0.00185874	0.00499037
BTBD7	-0.0186802	0.709115	0.789955
APBA3	-0.141937	0.0139553	0.0301347
MKS1	-0.351349	1.6192e-13	2.43982e-12
ABHD5	-0.105279	0.0758139	0.130711
ANOS1	0.776485	1.53724e-07	8.89932e-07
AKAP8L	-0.296138	6.58229e-11	6.57963e-10
MBTD1	0.143848	0.0582176	0.104325
UTP18	-0.113304	0.0171127	0.0360745
RNF216	-0.0925301	0.0615389	0.109382
TTC19	0.183416	0.00127979	0.00355244
PTBP1	-0.372582	7.62074e-19	2.63168e-17
DPF1	-0.711952	8.22938e-12	9.47286e-11
SYT7	-0.537611	0.000211131	0.000694896
LARS2	-0.315584	2.37396e-09	1.85738e-08
PIK3C2A	0.410552	2.76344e-07	1.53351e-06
PLAUR	0.759169	4.42046e-08	2.81292e-07
ANLN	0.214657	0.0189798	0.0394896
WIZ	-0.406023	5.87544e-14	9.53442e-13
RABGAP1	0.0173247	0.703696	0.785862
DCN	0.821964	5.5998e-08	3.50598e-07
QPCTL	-0.95376	3.81046e-31	1.03781e-28
PPP5C	-0.268632	1.11452e-10	1.07009e-09
CEP68	-0.296426	1.07874e-11	1.21597e-10
MAP4K3	0.0840506	0.208104	0.305831
ZBTB32	1.02805	9.54694e-14	1.49893e-12
TYROBP	0.241347	0.0584089	0.104615
TMEM159	-0.228051	0.00107206	0.00303511
GABRA3	0.388914	0.102825	0.16985
BRCA1	-0.153904	0.0385385	0.0732507
ERCC1	-0.189725	0.00195621	0.00522342
CD22	0.941468	1.09812e-07	6.52778e-07
SEMA3B	0.411578	0.0161051	0.0341739
MBTPS2	0.176926	0.00672174	0.0157501
PRICKLE3	-0.670821	3.41462e-23	2.45283e-21
LTF	-0.670427	0.00100085	0.00285101
EXTL3	-0.212921	0.00131006	0.0036263
NR1H4	0.711091	0.00385378	0.00959909
ELOVL5	0.11481	0.0517737	0.0943079
ALOX5	0.841423	4.03995e-11	4.17192e-10
KDM5D	0.0245489	0.929666	0.952097
CALCOCO1	0.0140023	0.795134	0.85505
UBR7	-0.0210009	0.624237	0.720112
MAP4K5	0.233178	0.000765042	0.00224246
EHD3	0.392456	0.00342361	0.00863009
PSMC4	-0.348249	1.99259e-11	2.14775e-10
MAN2B2	-0.2095	0.00119959	0.00335142
SLC7A14	1.13713	1.97705e-06	9.42536e-06
CLDN11	1.76121	3.27162e-17	8.84117e-16
SLC25A39	-0.718119	5.17839e-29	9.82259e-27
MVP	-0.154043	0.0711464	0.123821
NUB1	0.229416	9.20968e-06	3.91958e-05
PGM3	0.327961	1.5467e-06	7.51252e-06
RWDD2A	0.181819	0.0023752	0.0062219
CLK1	0.623957	1.5488e-16	3.80896e-15
POLR3B	-0.0910711	0.0736741	0.127604
ANGEL1	-0.21527	0.000131413	0.000450983
RNF14	-0.0918728	0.108235	0.17752
DNASE1L1	-0.290371	1.25546e-05	5.21494e-05
DDX11	-0.266117	5.78292e-05	0.000212335
HEBP1	-0.581442	3.06982e-15	6.07284e-14
GPRC5A	-0.584687	0.000823596	0.00239655
MAMLD1	-0.290817	0.00204173	0.00542562
CD6	0.851233	7.76351e-08	4.74817e-07
TACC3	-0.195315	0.00412598	0.0102059
UFL1	0.423244	1.10764e-09	9.12533e-09
POLA2	-0.0765035	0.167322	0.255648
ZC3H3	-0.587729	4.3142e-18	1.32995e-16
CAPN1	-0.524554	2.13476e-14	3.7233e-13
ACP3	1.56136	8.02644e-14	1.27433e-12
MDH1	-0.220665	3.7868e-05	0.000143563
SLC30A9	0.0798756	0.134918	0.213486
MTMR11	0.441818	9.42403e-06	4.00178e-05
COX15	-0.176109	0.000110755	0.000385561
CCDC88C	0.517611	3.46435e-05	0.000132223
YAF2	0.388818	4.2287e-11	4.35209e-10
ZMYND11	0.153388	0.0128147	0.0279397
WAS	0.635957	2.16081e-06	1.0215e-05
DPEP1	-0.175821	0.332061	0.444512
BID	0.0682196	0.26509	0.371298
MATR3	0.451675	1.79372e-08	1.21556e-07
NPC1L1	0.123986	0.459442	0.571513
XYLT2	-0.415477	8.68424e-14	1.37217e-12
RGPD5	0.496783	0.0156526	0.0333224
STMN4	0.652163	0.00385354	0.00959909
NUDCD3	-0.266663	3.48298e-07	1.90008e-06
ISL1	-0.325527	0.263903	0.369923
CHDH	0.565011	0.00151508	0.00414234
IL20RA	0.127366	0.599687	0.699174
CLCA1	0.0745837	0.815907	0.870026
CLCA4	-0.101856	0.741416	0.815219
GLT8D1	0.142518	0.000988985	0.00282087
ATP2C1	-0.140261	0.00328917	0.00832774
IGF1	-0.31481	0.0383045	0.0728493
SLC38A5	-0.145154	0.340103	0.452861
RALBP1	-0.0560638	0.253608	0.358331
RUFY3	0.0862958	0.173192	0.263208
CNTN1	0.271083	0.149697	0.233132
SLC11A1	0.00388035	0.976322	0.983891
WWTR1	0.916881	4.88529e-17	1.29287e-15
AGPS	0.0727579	0.227876	0.328973
ZNF806	0.655423	0.049117	0.090198
CXorf56	0.03395	0.407657	0.521631
ATP1A2	0.422761	0.0557542	0.100538
TTC27	0.0167361	0.687442	0.772651
ZNF582	0.164652	0.13602	0.214964
VSIG2	0.401345	0.00358109	0.00898992
PHLDB1	0.0449371	0.576466	0.67905
MARCO	0.991749	6.39465e-07	3.32341e-06
CYP24A1	1.1863	1.49893e-06	7.29842e-06
PRDM11	-0.298397	5.21827e-05	0.000192979
SYT13	-0.379377	0.203142	0.299983
SNAI2	-0.415763	0.000465478	0.00142662
CD74	0.62136	2.07617e-05	8.26465e-05
HGF	1.33748	5.32258e-22	3.13069e-20
ZRANB1	-0.0621915	0.282766	0.391111
NCDN	-0.37219	2.31798e-10	2.11835e-09
ADGRA2	0.0653487	0.566809	0.670663
CCT8L1P	-0.178358	0.411747	0.525667
ZFP64	-0.292745	7.56484e-11	7.48628e-10
MNAT1	0.0969639	0.0832305	0.141802
SAMD4A	-0.021525	0.765373	0.833332
RUNX3	-0.783526	9.6773e-10	8.05642e-09
MRE11	0.302029	1.06248e-06	5.31627e-06
PLEKHB1	0.28522	0.0621473	0.11032
SERPINB1	0.215898	0.00314998	0.00801474
CYP3A43	0.43154	0.0139761	0.0301763
SLC7A9	0.238323	0.0635423	0.112524
SPAST	0.322069	6.66875e-07	3.45318e-06
NRXN3	0.73881	0.000129559	0.000445236
OSBPL5	-0.247081	0.00307891	0.0078551
AQR	0.103753	0.0244756	0.049322
CPS1	0.0276561	0.847149	0.892964
C8B	0.145779	0.779907	0.844148
FHL1	0.570725	1.88841e-05	7.57811e-05
RTF2	-0.521318	3.00575e-23	2.18241e-21
GABRA1	0.718376	0.0277579	0.0550465
NLRP2	-0.0904485	0.663582	0.753093
SLC45A4	-0.29963	1.6463e-07	9.47805e-07
RNF10	-0.199129	3.52884e-07	1.92299e-06
ZNF839	-0.274989	7.23896e-07	3.7222e-06
ZDHHC6	0.135868	0.00778478	0.0179618
GRAMD1B	0.112675	0.454964	0.567257
RNH1	-0.384598	1.07095e-08	7.52777e-08
NDUFS1	0.0218979	0.651281	0.742897
RB1CC1	0.454921	5.89778e-08	3.67397e-07
ERP44	0.22084	2.80966e-06	1.30124e-05
ALAS1	-0.291053	6.6492e-06	2.90182e-05
BIRC3	2.11773	2.13451e-50	1.20886e-46
AKAP11	0.434548	2.0087e-09	1.5917e-08
GLRX2	0.0378238	0.559017	0.663721
SNAPC1	0.364599	2.68655e-07	1.49544e-06
DERA	-0.436549	6.89474e-11	6.87462e-10
STRAP	-0.113075	0.0215056	0.0440202
ABCC2	-0.985086	3.5173e-08	2.27175e-07
DEF6	0.411939	0.000653149	0.0019422
PLEKHO1	0.476768	1.61012e-07	9.29132e-07
GCLM	0.214537	0.00137611	0.0037922
UBR2	0.167113	0.00198895	0.00530084
EHD2	-0.120728	0.268737	0.375348
DEPDC1	0.35463	0.000716054	0.00211152
CCDC28A	0.216595	4.17469e-05	0.000157216
RRAGD	-0.50731	4.46233e-09	3.34034e-08
HSF2	0.101421	0.0698896	0.121961
PHF20	-0.0739269	0.0904888	0.152503
HSD17B6	-0.0445896	0.691299	0.775842
NR1H3	0.567125	2.17898e-10	1.99914e-09
TYMP	0.0410734	0.7377	0.812102
NCAPH2	-0.447291	2.55967e-12	3.20719e-11
TOMM34	-0.164046	0.00534163	0.012824
SEC63	0.195942	0.000169851	0.00057032
KPNA6	-0.0862688	0.0495772	0.0909168
VIM	-0.45565	1.0473e-10	1.00996e-09
RTEL1-TNFRSF6B	0.117418	0.210114	0.308213
FAS	0.887452	9.92124e-18	2.907e-16
RNASET2	0.434479	2.92266e-06	1.34979e-05
CD44	-0.126996	0.165578	0.253551
KCNG1	0.891281	5.0253e-06	2.23972e-05
AGPAT4	0.266813	0.0362248	0.06939
SLAMF7	0.861065	2.09979e-07	1.19005e-06
BTN3A1	0.617372	2.64495e-12	3.30777e-11
MIPEP	-0.384975	8.93667e-12	1.02217e-10
PRKCH	0.295322	0.00201824	0.00536951
INSRR	0.384071	0.0104386	0.0233065
IFNGR1	0.460252	1.84767e-11	1.9997e-10
B4GALT7	-0.368086	1.40296e-10	1.32489e-09
SH2D2A	0.21617	0.0892814	0.150738
VRK2	0.409507	4.72221e-14	7.79705e-13
TNFRSF1B	0.524843	7.4297e-06	3.21553e-05
VEZT	0.456488	2.25974e-16	5.40974e-15
POU2F2	1.25032	4.00058e-19	1.44312e-17
BRD9	-0.265616	7.44862e-07	3.82356e-06
SNX1	0.350071	1.40602e-08	9.70746e-08
TBPL1	0.307816	3.37843e-08	2.18776e-07
ARNTL2	1.69301	3.65184e-28	6.10859e-26
BCLAF1	0.342643	1.74868e-12	2.24934e-11
SLC39A9	-0.107798	0.0135128	0.0293118
ANK1	1.37718	8.68121e-21	4.13652e-19
IBSP	0.623903	0.0076312	0.0176434
TFB1M	0.242908	0.00042735	0.00131925
RABEP1	0.260415	2.93131e-06	1.35347e-05
HMGB3	-0.407431	3.19947e-06	1.46737e-05
NUP160	0.196233	0.00102162	0.00290539
BAK1	-0.400965	2.16828e-13	3.19552e-12
MUSK	1.80982	2.35406e-13	3.43862e-12
IKZF2	1.12868	2.35309e-20	1.04698e-18
GRN	-0.684568	9.65169e-18	2.83221e-16
FAM13B	0.156267	0.0354821	0.0681484
ARHGAP31	-0.0441202	0.565369	0.669419
CENPQ	0.340662	1.29769e-05	5.37798e-05
SARS1	-0.198265	8.43269e-05	0.000299933
RANBP3	-0.313429	1.4038e-11	1.55193e-10
ARID4A	0.545722	1.04039e-14	1.89459e-13
EIPR1	-0.304121	9.18395e-11	8.94566e-10
PNPLA6	-0.466391	2.28609e-11	2.44088e-10
IFT88	0.18636	0.00875332	0.0199481
ALG1	-0.524124	2.76485e-21	1.44413e-19
ZCCHC8	0.173992	0.000233329	0.000761637
ABCF2	-0.282974	2.65278e-08	1.75132e-07
CHPF2	-0.0615771	0.401922	0.515924
LRRC7	-0.0412863	0.754084	0.82479
FUT8	0.655927	8.86529e-17	2.26453e-15
UBA6	0.509183	9.53106e-17	2.40822e-15
GAB2	-0.554387	1.70032e-08	1.15543e-07
ATP6V0A1	-0.643367	6.27791e-18	1.88833e-16
PIAS1	0.256845	3.97738e-10	3.51687e-09
SLC4A7	0.643372	1.9916e-13	2.95712e-12
APBA2	-0.722854	3.49814e-06	1.59513e-05
MAP2K3	-0.289612	1.92916e-05	7.72599e-05
EFCAB1	-1.35579	1.1023e-07	6.54971e-07
TMSB10	-0.0705753	0.349174	0.462424
ASTE1	-0.0264389	0.543083	0.649668
RNF19A	0.409095	2.35209e-09	1.84099e-08
PEX3	0.308269	2.724e-07	1.51332e-06
GABARAPL2	0.138894	0.00109678	0.00309516
MYOC	0.0552598	0.87684	0.914855
SH3YL1	0.280991	3.42699e-05	0.000130911
FAM136A	-0.103383	0.0126513	0.0276168
VCL	-0.033664	0.60843	0.706355
DEPDC1B	0.00500124	0.952949	0.967495
DAPK2	0.576934	3.37618e-07	1.84614e-06
NSMAF	-0.0188721	0.706123	0.787818
ADSS2	0.00283604	0.957342	0.970748
STAP1	2.12305	2.76926e-26	3.35732e-24
TIMP2	-0.542944	8.74722e-12	1.00195e-10
RFC1	0.0638867	0.228226	0.329346
TBC1D23	0.407406	7.93124e-11	7.82544e-10
CUL3	0.257327	1.602e-07	9.24855e-07
MYOM2	-0.150596	0.2915	0.400938
OTC	0.482681	0.0292516	0.0576539
CYP46A1	0.0416449	0.74228	0.815919
ZZZ3	0.0726768	0.274078	0.381287
SLC18A1	1.77097	4.21028e-14	6.99842e-13
USP2	-0.516952	4.07621e-05	0.000153756
CASR	-0.446923	0.108105	0.177338
TUBG2	-0.281277	1.00237e-06	5.03841e-06
RPL26L1	-0.0059899	0.9102	0.938831
FLT4	0.341723	0.00206526	0.00548235
NSUN2	-0.158076	0.000271782	0.000874556
FBXO42	-0.15874	2.89572e-05	0.000112206
MFAP3	0.227967	0.00234585	0.00615193
MRI1	0.220273	2.44447e-05	9.60632e-05
METTL1	-0.311196	5.74893e-05	0.000211282
HOXC8	-0.174105	0.114973	0.186711
AGA	0.0123706	0.856526	0.899858
PI4K2B	0.534174	1.71108e-15	3.5478e-14
BOD1L1	0.22573	0.000298516	0.000952387
MAT2B	0.319306	7.88504e-10	6.63965e-09
TLL1	1.17664	2.429e-13	3.53767e-12
EDC4	-0.295783	1.16475e-09	9.57402e-09
TRIO	-0.192094	0.017858	0.0374206
VCAN	0.736273	2.07892e-06	9.86553e-06
CLEC16A	-0.331943	2.84565e-13	4.1008e-12
MSR1	1.07609	1.84761e-19	7.07013e-18
CDH1	-0.922484	4.31196e-06	1.93923e-05
MTREX	0.214465	6.67217e-05	0.000242427
DNAH5	1.90396	3.06367e-19	1.12203e-17
ZFYVE16	0.0439992	0.602967	0.701901
RIPOR1	-0.377276	5.28369e-10	4.58552e-09
C6	0.509785	0.0391403	0.0742607
RAI14	0.060793	0.41673	0.530551
SOX30	0.261287	0.0512283	0.0934691
PNKP	-0.45253	9.90726e-12	1.1231e-10
BEST2	-0.730499	0.000674189	0.00199952
PHLPP2	0.176872	0.00491133	0.0119093
SPDL1	0.33488	5.60207e-06	2.47535e-05
STAU2	0.102375	0.0733523	0.127147
SLC66A1	-0.639539	2.13403e-20	9.5595e-19
CTNS	-0.662116	2.64807e-25	2.70568e-23
RTN4R	-1.46392	3.9166e-24	3.30361e-22
PHF23	-0.567208	4.63775e-27	6.3619e-25
CDH10	0.672749	0.0531815	0.0965308
INPP4A	0.250241	4.04026e-09	3.04683e-08
RAB27B	0.993569	1.56566e-06	7.59811e-06
PSMA4	0.21836	1.46821e-06	7.16027e-06
MYO16	-0.740112	1.01455e-05	4.28156e-05
LSG1	-0.143352	0.000116652	0.000404174
PARP3	0.0953259	0.186527	0.279784
TNC	0.426974	0.00336645	0.00850115
THAP3	-0.232365	1.89126e-05	7.58801e-05
RIPOR3	1.09756	1.45528e-15	3.04771e-14
TDP1	-0.0992412	0.0376577	0.0717845
AIFM2	-0.628666	8.82984e-15	1.6289e-13
C2orf83	0.143149	0.639601	0.733326
SPATA7	0.0868451	0.133765	0.211942
MED17	0.149215	0.00427432	0.010538
RETSAT	-0.920141	5.7895e-26	6.69152e-24
CAPG	-1.15243	3.47755e-10	3.09389e-09
AP2S1	-0.490069	1.6224e-13	2.44278e-12
USH2A	-0.723999	1.10701e-06	5.5217e-06
ZPBP	-0.501802	0.14794	0.230841
TG	-0.897719	4.16566e-08	2.66146e-07
ADAM28	1.85789	7.47229e-40	7.59568e-37
BARX2	0.164083	0.455167	0.567371
DCUN1D1	0.329886	1.46269e-09	1.18076e-08
JADE2	-0.246673	0.00199779	0.00532119
ZIC2	-0.274759	0.270062	0.376679
LCP2	0.898391	2.82319e-14	4.84724e-13
TRIT1	-0.0547671	0.235224	0.337405
ADRB1	1.74592	1.66414e-13	2.50372e-12
GUCA2B	-0.260957	0.75688
CUL7	-0.341866	2.79395e-07	1.54957e-06
CTNNA1	-0.135119	0.0087915	0.0200213
PHKA2	-0.0561596	0.288063	0.396968
CNTLN	0.41242	4.11414e-08	2.63109e-07
EPHA3	1.12278	1.73685e-09	1.39046e-08
HSPA5	0.0691951	0.245832	0.349561
DSG2	0.442838	0.0373108	0.0711984
GEMIN8	-0.0502104	0.424839	0.538902
OFD1	0.544342	3.88372e-17	1.03961e-15
GPM6B	0.0749246	0.461898	0.573866
MAGEC2	0.690013	0.0260645	0.0521106
PREX2	0.850347	2.10597e-11	2.26135e-10
WDR37	-0.151632	0.00609114	0.0144217
YTHDC2	0.266301	1.28541e-05	5.33123e-05
CTPS2	-0.0221754	0.701291	0.783729
ATP6V1H	-0.103134	0.0651436	0.114913
POLR2B	0.0306376	0.541323	0.648169
FAM214A	0.623008	3.33794e-19	1.21626e-17
ARAP2	0.817359	2.25907e-14	3.92456e-13
TPR	0.285264	2.30798e-06	1.08448e-05
CP	1.40666	1.90336e-14	3.3388e-13
KIAA0556	-0.115924	0.159993	0.246541
DTNBP1	-0.252155	1.22497e-06	6.05821e-06
XK	0.175648	0.302099	0.412482
ANO2	-0.309365	0.0484786	0.0891908
C12orf4	0.420667	3.59261e-14	6.05808e-13
SCML1	0.658139	7.95478e-10	6.69268e-09
WWC3	-0.111816	0.112859	0.183774
ARHGAP6	1.3834	1.0667e-15	2.27234e-14
FAM184B	0.013295	0.923643	0.948052
MAP4	-0.297729	2.33491e-07	1.31447e-06
GOPC	0.411212	5.46951e-12	6.46491e-11
ROS1	2.47688	2.19697e-15	4.47567e-14
USP28	0.38491	1.78203e-11	1.93712e-10
HDAC9	0.558336	9.25388e-05	0.000326534
TSPAN17	-0.329222	4.9166e-08	3.10174e-07
NOP16	-0.279394	5.08242e-06	2.26263e-05
CC2D2A	-0.079803	0.203314	0.300148
RRM2B	0.44037	2.88556e-08	1.89208e-07
ZNF800	0.321797	7.80946e-11	7.71488e-10
TNFRSF17	1.37956	2.82035e-09	2.18421e-08
SNX29	-0.214258	0.000302716	0.00096439
LMO3	-0.131193	0.577016	0.679496
MRPS10	-0.0156096	0.732935	0.808228
GUCA1A	-0.0414886	0.824601	0.876279
RSF1	0.341524	8.53441e-06	3.65416e-05
VPS13D	0.00371704	0.941828	0.960187
CELF2	-0.155	0.0713947	0.124204
FAM120A	0.0488211	0.249911	0.35432
R3HDM1	0.173119	5.17407e-05	0.000191487
COL9A2	1.58293	6.41136e-25	6.13942e-23
KITLG	0.726849	1.05048e-10	1.01277e-09
ERCC8	0.090482	0.0723567	0.125652
ADAMTS6	1.31851	5.5382e-18	1.68242e-16
H6PD	-0.0183665	0.761489	0.830426
VAMP3	-0.159394	0.00104219	0.00295689
PER3	-0.387823	4.91782e-06	2.19428e-05
UTS2	0.616282	0.0019984	0.00532245
TNFRSF9	1.42718	3.37924e-18	1.05569e-16
EPN3	-1.11862	2.97196e-07	1.64118e-06
LTBP1	0.582136	1.29498e-05	5.36728e-05
RCN1	0.320873	0.00015885	0.00053682
ELN	0.173568	0.341786	0.454751
RFC2	-0.227747	4.68896e-05	0.000174839
ARID1B	-0.100172	0.0663642	0.116708
CLPTM1L	-0.399784	4.90041e-12	5.83049e-11
NEDD4L	-0.845608	1.39323e-18	4.64145e-17
FOXP3	0.424697	0.000664033	0.00197176
PPP1R3F	-0.0659073	0.466235	0.57804
HEXB	0.0218367	0.713522	0.793327
PTCD2	0.139859	0.00387486	0.00964554
NEXMIF	0.697436	0.00206195	0.00547479
JKAMP	0.0190206	0.670496	0.758702
DKK3	1.27179	6.60145e-15	1.24327e-13
ARHGEF5	-0.257621	0.110985	0.181281
NFE2L3	1.04606	1.24426e-21	6.77542e-20
MCUR1	-0.131991	0.00935467	0.0211519
LIMA1	-0.00604026	0.935992	0.956303
LETMD1	-0.134524	0.0252264	0.0506496
SLC4A8	0.795753	4.32613e-09	3.24574e-08
LAMC3	-1.10496	2.00266e-13	2.97131e-12
PTGER3	0.953405	3.48861e-11	3.64626e-10
TNIP3	1.69763	1.27737e-23	9.83299e-22
MAPK9	0.215791	1.45858e-05	5.97973e-05
COL23A1	-0.14336	0.34017	0.452936
BCAR1	-0.389666	1.63032e-06	7.89356e-06
FAM160A2	-0.0646659	0.122244	0.196635
HERPUD1	0.122744	0.053784	0.0974859
HOMER3	-0.645838	1.32164e-14	2.37619e-13
RAD51	-0.349381	2.82425e-07	1.56484e-06
POLQ	0.116845	0.179839	0.271477
PIK3CB	-0.27056	8.67607e-05	0.000307872
CYBA	-0.35765	0.000694596	0.00205359
THOC3	-0.223402	0.00014451	0.000492558
HEBP2	-0.0155739	0.835692	0.884651
MPHOSPH9	0.382505	1.22616e-07	7.22287e-07
PLEKHA5	-0.408525	8.79439e-05	0.00031154
PRSS8	-1.78683	8.59007e-13	1.15478e-11
SIKE1	0.334855	1.77857e-06	8.55183e-06
RRP12	-0.474104	3.27755e-14	5.56468e-13
FNIP2	0.0299611	0.720336	0.798596
MSMO1	0.118168	0.211444	0.309683
TTC17	0.0850665	0.0496062	0.0909657
ALX4	0.832609	7.02404e-05	0.000254233
FSTL4	-1.60962	3.33052e-21	1.70588e-19
FOXN3	0.0919639	0.179112	0.270555
METTL24	1.35353	4.56522e-13	6.38841e-12
AKR7A2	-0.629336	2.44726e-25	2.51589e-23
MRTO4	-0.20325	3.03735e-05	0.00011719
NNAT	-0.21069	0.0640504	0.113267
USE1	-0.391292	2.51632e-08	1.6693e-07
MCF2L2	0.154615	0.242957	0.346313
NRIP2	0.225515	0.00455294	0.0111376
LAMA3	0.347819	0.0193547	0.0401537
AP5M1	0.071448	0.133831	0.212028
ANAPC4	0.311772	1.51174e-08	1.03796e-07
KCNQ1	0.0434111	0.658477	0.748972
TRAPPC3	-0.217904	2.42178e-07	1.35875e-06
THRAP3	-0.242448	3.10701e-12	3.82054e-11
PHPT1	-0.750115	5.043e-21	2.48353e-19
ENTPD2	0.680676	0.00207478	0.0055048
LY75	1.30966	2.03065e-19	7.74813e-18
ARID4B	0.693293	6.75434e-22	3.90334e-20
OPN3	0.263051	0.0173298	0.0364604
SDCCAG8	0.378829	4.4007e-11	4.51738e-10
PTPRN	1.02262	4.80257e-07	2.55698e-06
HHAT	-0.703677	1.53533e-14	2.73018e-13
KIF1B	-0.125132	0.0227077	0.04617
FOXC1	0.173127	0.158828	0.245069
TBC1D22A	-0.31306	8.31939e-08	5.0616e-07
SYNE2	-0.146976	0.0476836	0.0879316
PLEKHH1	-0.54829	1.40454e-06	6.87683e-06
ATP9A	-0.110926	0.349748	0.462982
SPO11	-0.0652851	0.921901
CBLN4	1.49294	5.96723e-09	4.36386e-08
CHRDL2	-0.0375432	0.852499	0.896991
FAM168A	0.0952124	0.118508	0.191612
RELT	-0.111887	0.146737	0.229314
GALC	0.148981	0.0717838	0.124761
NOP58	0.353153	1.40895e-08	9.72269e-08
SZRD1	-0.223878	9.68679e-07	4.88206e-06
KCNH2	0.497081	0.0263065	0.0525361
CUL1	0.0648783	0.201908	0.298517
FAM114A2	0.0718375	0.143351	0.224811
CYFIP2	0.335002	0.00717239	0.0166907
TAB2	0.348516	6.11409e-09	4.46448e-08
GINM1	0.331294	8.43512e-09	6.03664e-08
EIF2AK2	0.410928	9.35255e-11	9.09202e-10
USP36	-0.541071	1.29926e-25	1.41099e-23
KMT2C	0.22423	6.41999e-06	2.8089e-05
MCOLN3	0.118382	0.532245	0.6395
CCDC85A	0.490694	0.0005868	0.00176182
PUM2	0.223552	4.96359e-07	2.63493e-06
MRPL43	-0.368116	2.16433e-13	3.19088e-12
ITIH4	0.668003	9.28891e-08	5.59055e-07
ITIH1	0.265349	0.201241	0.297687
HPF1	0.289146	2.07153e-07	1.17555e-06
ZFR	0.282906	1.05241e-06	5.26921e-06
ZNF280C	0.115898	0.0347073	0.0668514
NPFFR2	0.40057	0.159075	0.245353
PHF21B	-0.352642	0.155625	0.240915
TRAF1	1.36772	7.74369e-22	4.40351e-20
RC3H2	0.150835	0.00565946	0.0135004
IL17RB	0.192983	0.0122067	0.0267391
TRAF3IP2	-0.462784	2.35613e-07	1.32454e-06
GYG2	-0.586722	1.31655e-05	5.44671e-05
DCBLD2	0.585157	2.60078e-07	1.45096e-06
SERPINB3	-0.373237	0.383617	0.497925
SOAT1	-0.332358	6.26211e-05	0.000228512
PKP2	0.6541	0.000730124	0.00214949
MSH4	0.573498	0.000468002	0.00143359
F7	-0.603706	0.0110411	0.0244763
GDI2	-0.0209102	0.68041	0.767052
PRDM1	1.15741	5.85787e-22	3.41238e-20
ATG5	0.486008	1.88982e-16	4.58789e-15
TMCC3	0.503979	6.13361e-06	2.69192e-05
PITHD1	-0.31459	1.30791e-09	1.06755e-08
MTA3	-0.259825	3.06527e-07	1.68824e-06
USP13	-0.0137591	0.860553	0.902797
ATP11B	0.468571	1.54407e-12	2.00174e-11
LAMC2	0.0202615	0.923521	0.947971
CDK14	0.972278	1.35012e-13	2.05625e-12
SEC61A1	-0.264726	5.73221e-08	3.57927e-07
PPP1R12A	0.582929	5.60037e-21	2.74439e-19
RASGRF1	-0.429923	0.017089	0.0360341
CAMK2B	1.79247	1.02928e-25	1.12721e-23
CROCC	-0.273113	0.00028178	0.000903865
POLR3E	-0.110249	0.00459497	0.0112301
ATP2B4	0.0277516	0.698621	0.781538
ZC3H11A	0.110895	0.028966	0.0571677
RIOK2	0.182781	0.000170653	0.000572946
YIPF1	-0.242794	1.53881e-08	1.05471e-07
NDC1	0.0350665	0.54434	0.650629
DGKG	0.0827514	0.439802	0.553
FLYWCH1	-0.780182	2.49431e-30	5.993e-28
UNKL	0.0959242	0.0891233	0.150515
TBXAS1	0.844062	9.48251e-12	1.07931e-10
PARP12	0.594412	4.14513e-09	3.11821e-08
ALDH18A1	-0.317066	5.66988e-11	5.72534e-10
TARBP1	0.178487	0.0106616	0.0237642
GATB	-0.327909	4.27512e-10	3.76044e-09
MXD1	0.272612	7.44375e-05	0.000267834
CDK17	0.101077	0.0771396	0.132627
DNAJC25	0.184301	0.0126507	0.0276168
SLC2A3	0.20777	0.0644255	0.113849
PSD	0.0194826	0.861989	0.903859
CTDP1	-0.489847	3.805e-21	1.93144e-19
YBX3	-0.11652	0.184348	0.276973
STYK1	1.08089	6.41373e-14	1.03571e-12
WNK1	-0.0937792	0.0680935	0.119273
RPS17P5	-0.120593	0.440763	0.55398
CCAR1	0.326838	5.79506e-09	4.24971e-08
OGFR	-0.190057	0.00208732	0.0055351
GNA15	0.0626991	0.639936	0.733544
CREB3L3	0.521838	0.00547	0.0130985
PIGV	-0.313684	2.80842e-09	2.17614e-08
PTPRU	-1.25911	2.99862e-12	3.70681e-11
SNRNP40	-0.0723369	0.108084	0.17731
RIMBP2	0.0877132	0.673026	0.760849
COL11A1	0.167444	0.464829	0.576695
QSER1	0.310293	4.81671e-06	2.15232e-05
MPC1	-0.00145476	0.982295	0.987836
ACAA1	-0.247476	1.40961e-06	6.89824e-06
BCAT1	1.27321	2.43169e-17	6.65758e-16
HDAC7	0.163746	0.00776311	0.017916
LZTS1	-0.581817	1.36584e-07	7.9828e-07
PRDM6	0.571664	9.75681e-05	0.000342755
WNT8A	0.0422909	0.905458	0.935454
SPAG4	0.324342	0.00938688	0.0212126
NCKAP1	0.129751	0.0253762	0.0509193
MRPS35	0.134487	0.00806001	0.0185364
GUCY1B1	0.869627	4.52965e-16	1.02263e-14
SFSWAP	-0.202094	3.92937e-07	2.12547e-06
TNK2	-0.253247	5.52202e-05	0.000203471
MON2	0.240632	1.43353e-06	7.0058e-06
CDH3	-1.26323	8.52449e-12	9.78983e-11
ARSF	-0.811987	0.0112808	0.0249382
GPBP1	0.347541	7.52487e-12	8.72524e-11
DGAT2	-0.217712	0.0877304	0.148403
ZNF112	0.196429	0.0109534	0.0243215
CS	-0.37516	1.88783e-13	2.81569e-12
LTK	0.223925	0.21725	0.316609
MRPS24	-0.475218	4.4421e-10	3.89952e-09
ELMO2	-0.306281	1.26892e-10	1.2078e-09
WAPL	0.240184	2.26418e-06	1.06643e-05
VMP1	0.204281	0.000316883	0.00100548
APPBP2	0.105968	0.0673686	0.118186
POLD1	-0.534673	3.92911e-16	8.98822e-15
SEZ6	-1.26266	1.20851e-12	1.59064e-11
EIF4B	-0.171236	0.00569144	0.013571
SLC6A16	-0.114123	0.267379	0.373857
BICRA	-0.372084	5.50973e-13	7.61869e-12
SPHK2	-0.325332	1.23268e-08	8.57041e-08
RPL18	-0.562703	1.74881e-13	2.62018e-12
CA11	-0.160524	0.0905733	0.152626
ISOC2	-0.446802	7.83828e-11	7.74143e-10
U2AF2	-0.360475	8.69288e-16	1.87906e-14
EPN1	-0.637204	1.18001e-24	1.10072e-22
MED29	-0.0415901	0.242773	0.346121
AHRR	-1.16499	1.60818e-16	3.94278e-15
GSC2	-2.06098	4.98692e-09	3.70366e-08
ZNF275	0.165053	0.0158955	0.0337798
MTMR1	0.149224	0.00413431	0.0102236
GPC1	0.297178	0.0494232	0.0906931
ADCK1	-0.737655	1.92154e-27	2.84244e-25
HAGH	-0.364456	1.57213e-08	1.07569e-07
RNF4	-0.146501	0.000287502	0.000919986
CASP8	0.651843	3.41622e-26	4.07909e-24
LIMCH1	0.173074	0.261358	0.367174
INTS13	0.0782413	0.233369	0.335242
TM7SF3	-0.284843	0.000145307	0.000494942
DLX3	-0.387981	0.0845441	0.143731
SPA17	0.102225	0.173028	0.262988
TSPAN32	1.26885	2.43642e-19	9.13807e-18
CCN5	-0.919901	4.75691e-06	2.12872e-05
DMRT3	0.674876	1.11536e-07	6.62135e-07
ST3GAL6	0.00587139	0.95391	0.968272
ATP2C2	-0.40401	0.0132832	0.0288548
NGFR	1.08488	8.04061e-08	4.90328e-07
CDON	-0.290771	0.00153939	0.00420257
TAF2	0.195916	0.00293886	0.00753659
HIPK2	-0.385171	2.16638e-05	8.59698e-05
TNPO3	-0.0976508	0.0313039	0.0611517
BORCS8-MEF2B	0.0330413	0.739004	0.813175
RFXANK	-0.486308	4.08246e-15	7.89102e-14
TMEM161A	-0.568276	1.14602e-16	2.85742e-15
LPAR2	-0.33574	0.00185058	0.0049715
CTSA	-0.515897	1.84056e-11	1.9931e-10
SUGP2	0.0551778	0.210821	0.309021
SLC12A2	0.437013	8.26484e-07	4.20767e-06
SNX24	-0.0423886	0.653497	0.74487
EYA2	0.175005	0.223409	0.323868
CNN2	-0.0243571	0.808991	0.865262
ABCA7	-0.141045	0.148654	0.231771
SNCAIP	1.15896	1.19919e-13	1.84409e-12
DDX20	-0.039168	0.45024	0.562857
BTBD1	0.154919	0.0047152	0.0114847
FAR2	-0.346429	0.0020731	0.00550118
BCAS1	0.687627	1.37931e-05	5.68002e-05
POU1F1	0.375192	0.0148814	0.0318724
CHI3L2	0.694871	3.20587e-05	0.000123272
SBNO2	-0.130119	0.0197443	0.0408764
PMS1	0.393775	6.51617e-10	5.5626e-09
HMG20B	-0.670483	9.84021e-17	2.48001e-15
CALCRL	0.879921	7.85024e-16	1.70997e-14
TAF11	-0.0293301	0.59017	0.690473
ANKS1A	0.11375	0.333845	0.446422
AP3D1	-0.440221	2.0174e-23	1.50902e-21
ZNF76	-0.207484	0.000167492	0.000563385
SLC9A3R2	-0.00397205	0.966763	0.977314
NTHL1	-0.519393	2.80547e-14	4.81889e-13
UHRF1BP1	-0.263475	5.97316e-05	0.000218915
GNAI3	0.137617	0.00516501	0.01246
IPO5	0.0181738	0.768364	0.835625
OAT	-0.173132	0.00332734	0.00841202
WDR3	-0.0763362	0.278797	0.386442
PKN2	0.30654	7.13756e-06	3.10061e-05
WDR18	-0.484497	2.2068e-13	3.24745e-12
TRAM2	0.137506	0.0498067	0.0912532
NTN1	-0.389518	0.0299663	0.0588986
GLP2R	0.592965	0.0128346	0.0279738
MCM10	-0.0930383	0.281698	0.389863
DGKA	0.676479	9.83987e-11	9.54003e-10
ERBB3	-0.139414	0.191016	0.285243
ROPN1	-0.168084	0.252227	0.356697
ANKRD44	0.320117	3.47685e-05	0.000132624
KARS1	-0.095626	0.0176779	0.0370939
ADAT1	-0.0105564	0.849101	0.894427
PDIA5	-0.105667	0.147751	0.230598
TBC1D22B	-0.361085	1.1581e-13	1.78714e-12
NDUFB4	-0.525073	2.21645e-16	5.31252e-15
SPEN	-0.0646268	0.152986	0.237404
MYLK	0.430591	0.000104459	0.000365312
ZC3H15	0.271934	4.23781e-07	2.27709e-06
MAP2K4	0.148142	0.00207184	0.00549883
PACC1	-0.118742	0.0506611	0.0926132
SNAP91	1.43601	1.42446e-06	6.96745e-06
SLK	0.419139	2.03716e-09	1.61232e-08
CYB5R4	0.456884	4.76048e-11	4.86654e-10
COL17A1	-0.983966	0.0003141	0.00099729
GSTO2	-0.889672	2.07974e-11	2.235e-10
SEC61A2	-0.218746	0.000448436	0.00137887
PRKCQ	1.03134	1.23316e-11	1.37556e-10
TLE2	0.471281	0.00120999	0.00337834
ASB1	-0.0991149	0.0889127	0.150192
FAM107B	0.842791	1.73926e-14	3.0645e-13
ME1	0.60041	6.13916e-05	0.000224459
TBC1D1	0.192836	0.00162741	0.0044214
CDK13	0.147674	0.000275274	0.000884932
MTHFD2	0.302066	0.000112035	0.000389606
SLC9A7	1.27892	5.63214e-20	2.34047e-18
FOXJ2	-0.176467	0.000166428	0.000560089
YBX1	-0.218109	7.39677e-06	3.20198e-05
PDE4A	-0.030363	0.729629	0.805385
PPP2R5A	0.111016	0.0877199	0.148396
CTNNA2	-0.555306	0.00492301	0.011934
ELAVL1	-0.190035	6.01806e-10	5.16742e-09
TIE1	-0.0134488	0.909708	0.938495
DIP2B	-0.183489	0.00463632	0.0113144
SMARCD1	-0.291525	3.02175e-09	2.33335e-08
KDM4A	-0.242965	6.59919e-08	4.08141e-07
NFYC	-0.273715	6.45299e-11	6.47159e-10
ZMYND12	-0.334395	0.000294756	0.000941148
SLC9A3	0.422362	0.0519266	0.0945821
NGEF	2.42615	1.89917e-25	1.9971e-23
ASPM	0.472833	1.87895e-06	8.98974e-06
CD84	1.11823	4.26505e-17	1.13708e-15
ELOVL1	-0.348373	2.56673e-08	1.69989e-07
SPI1	0.27094	0.0334842	0.0648134
ZNRD1	-0.305858	8.86623e-08	5.36573e-07
MPPED2	0.0723663	0.642925	0.736268
CLDN18	0.0590827	0.654508	0.745634
ZBTB11	0.413027	8.60806e-11	8.43862e-10
ATXN3	0.129206	0.0086909	0.0198241
GOLGA5	0.0118358	0.798161	0.857399
FGFR2	-0.108738	0.594351	0.694299
LRRC40	0.396268	7.65165e-08	4.68626e-07
ISOC1	0.122905	0.0247183	0.0497579
EML1	0.388062	0.00263262	0.00682452
TRMT11	0.405902	2.31451e-09	1.81408e-08
THUMPD1	0.31524	7.41616e-12	8.60926e-11
MSANTD3	-0.144983	0.035541	0.0682423
KIF26A	-0.787538	2.74411e-08	1.8065e-07
ATG2B	0.118886	0.0274842	0.0545769
ARFGEF1	0.156888	0.0167407	0.0353711
ACSM2B	-0.0225435	0.927023	0.950127
ZFAT	-0.0925119	0.0863786	0.146423
MTFR1	0.0213706	0.737238	0.811727
STAG3	-0.552345	9.31348e-05	0.000328432
FECH	-0.314731	9.2441e-09	6.56526e-08
MYO9A	0.184744	0.00127187	0.00353293
DDX3Y	0.104374	0.708533	0.789574
PFKP	-0.771989	4.07347e-12	4.90549e-11
IDI1	0.0430453	0.569729	0.673128
SP100	0.612142	8.19115e-23	5.52262e-21
KLF6	0.0595722	0.438025	0.551236
PLPP1	0.00352716	0.959271	0.971996
NEO1	-0.501657	3.5017e-06	1.59657e-05
TRAM1	0.292165	1.17199e-06	5.81725e-06
PHKA1	0.666611	0.000339935	0.001071
TNFRSF1A	0.0526854	0.393705	0.507694
CACNB1	0.0821936	0.21174	0.310047
EVI5	0.307696	6.80988e-06	2.96769e-05
STOML1	-0.198392	0.00141366	0.00388675
PKM	-0.30594	1.161e-05	4.85105e-05
DHX29	0.199281	0.000187183	0.000623586
DNTTIP2	0.283939	3.70039e-06	1.6802e-05
METTL22	-0.183233	0.000202569	0.000669498
TP53BP1	0.151732	0.017094	0.0360427
TRO	-0.0326727	0.783697	0.846517
RRP15	0.107863	0.0701823	0.122412
RHOA	-0.0986162	0.0127309	0.0277683
DHX8	-0.274377	8.19445e-11	8.06907e-10
PMS2P4	-0.12193	0.0486305	0.0894289
PRKCZ	-0.257434	0.00991614	0.0222678
ZFY	0.364341	0.193848	0.288653
IARS2	-0.0657721	0.253921	0.358721
SYT1	1.8729	5.48692e-16	1.22136e-14
NAV3	0.158239	0.132066	0.209725
IDH3G	-0.546756	2.25865e-18	7.24655e-17
ROGDI	-0.421114	3.77943e-09	2.86815e-08
PDZD4	-0.384171	0.00982729	0.022092
ATP2B3	-1.05541	2.49935e-05	9.8016e-05
ROCK1	0.470915	1.74932e-10	1.62565e-09
CBFB	0.347802	7.34316e-10	6.21769e-09
PDK3	-0.103253	0.178661	0.269997
HYAL2	-0.190663	0.0027562	0.00711003
HDAC4	-0.364365	2.1572e-08	1.4446e-07
RASSF1	-0.0838969	0.180038	0.271685
FGFR3	-0.957729	1.80286e-06	8.656e-06
IFI35	0.0348258	0.728656	0.804709
HEATR6	-0.231102	6.58687e-07	3.41436e-06
COASY	-0.468783	9.52421e-24	7.61245e-22
PLEKHH3	-0.29723	1.71672e-06	8.27148e-06
MEF2A	0.477242	2.92039e-13	4.19023e-12
OTUD5	-0.244366	5.64012e-08	3.52844e-07
TFE3	-0.0224347	0.654356	0.745567
TBC1D25	-0.270023	1.52885e-08	1.04843e-07
ACSL4	0.661713	1.709e-18	5.62254e-17
INPP5A	-0.198436	5.99899e-05	0.00021978
GPKOW	-0.125726	0.000962417	0.00275222
GRIPAP1	0.0252623	0.501545	0.611246
FTSJ1	-0.131217	0.00166468	0.00451183
PRR11	0.100591	0.2071	0.304637
REEP1	0.565038	0.000166953	0.000561714
ATP11A	-0.687289	4.93017e-10	4.29847e-09
POLR1A	-0.415858	6.32382e-17	1.64786e-15
LAPTM4A	-0.0137291	0.743009	0.81648
TTC7A	0.236626	0.00327157	0.00828794
IP6K2	-0.0454348	0.302661	0.413136
STON1-GTF2A1L	-0.463506	0.0291426	0.0574648
SRBD1	0.0832775	0.119183	0.192508
KIF2A	0.244332	0.000391795	0.00122004
RASGRP2	1.5254	7.75313e-22	4.40351e-20
PSME4	0.152731	0.00198144	0.00528332
IFT80	0.484064	7.79016e-11	7.69785e-10
SIRT2	-0.325695	8.00229e-09	5.74611e-08
ERLEC1	0.436158	1.81617e-13	2.71321e-12
PPP2R5B	-0.237518	0.00034553	0.00108716
PYGM	0.114523	0.332597	0.445033
PAGE1	0.851334	0.0425601	0.079836
PITX1	-1.28207	4.43805e-07	2.37438e-06
TRPC7	-0.0467109	0.887905	0.923137
MAST4	0.267303	0.0105349	0.0235015
ADGRF5	0.738344	3.91162e-12	4.72925e-11
SDK2	-0.574672	0.00530175	0.0127453
ADAM7	0.243307	0.588099
NUP133	-0.0181545	0.734779	0.809785
NUCKS1	0.114018	0.0553483	0.0999011
VPS35	-0.0580102	0.186685	0.279914
DNAJA2	0.130379	0.00148291	0.00406278
BCL3	0.363579	8.68833e-05	0.000308279
KCNAB2	-1.57226	1.35998e-30	3.30767e-28
ABCC9	1.21711	2.52077e-23	1.84379e-21
GAL	-1.3364	3.67447e-09	2.79491e-08
CLEC2D	1.14795	2.82405e-29	5.65438e-27
FUNDC1	0.183175	3.81507e-05	0.000144552
MAOB	0.556991	0.00538592	0.0129233
RORA	0.796805	2.98591e-13	4.28114e-12
DRD4	-0.195693	0.10689	0.175693
TGFBR3	0.2598	0.0051284	0.0123811
PLA2G10	-0.240329	0.0547367	0.098973
HES2	-2.52334	2.84792e-24	2.49233e-22
ATP1B3	0.062177	0.309456	0.420293
NEDD4	0.469731	2.53022e-08	1.67683e-07
PIGB	-0.0107714	0.863341	0.90504
MAPK6	0.278106	0.000236937	0.000772461
GNB5	0.0687067	0.350451	0.46379
RAB27A	-0.31517	0.00103018	0.00292659
HDHD5	-0.470485	1.28969e-17	3.71572e-16
UFD1	-0.195516	0.000157813	0.000533591
LRP6	0.16834	0.020167	0.0416429
GUCY2C	0.881807	1.16932e-07	6.92097e-07
SCT	0.478832	0.00390847	0.00971884
PHRF1	-0.311082	1.56367e-10	1.4641e-09
ELP1	-0.0606914	0.192209	0.2867
NUCB2	0.827943	2.31644e-19	8.73768e-18
PFN2	-0.291719	0.000568926	0.00171387
PTPN3	0.176229	0.212669	0.311131
SPTB	-0.128033	0.385186	0.499421
DAPP1	1.71519	4.48266e-33	1.72534e-30
FGF10	1.29469	3.11312e-07	1.71245e-06
SLC44A1	0.0923833	0.22613	0.326977
TMEM260	0.0766061	0.210046	0.308135
SMG6	-0.188576	0.00119645	0.00334477
EXOC5	0.269678	2.62804e-05	0.000102646
CLTCL1	-0.441677	0.000113739	0.000395046
FGF22	-0.336235	0.0114038	0.0251679
FSTL3	-0.264608	0.0420524	0.0790181
DGCR2	-0.40719	7.14357e-17	1.8534e-15
RNF126	-0.310153	5.73572e-07	3.00617e-06
MNT	-0.386966	7.00808e-17	1.81944e-15
ZXDC	-0.0927386	0.021107	0.0432951
JMJD6	-0.177677	0.000842603	0.0024454
POLB	0.0252219	0.705137	0.786962
ST6GALNAC1	-1.97545	1.18447e-23	9.1741e-22
WIPI1	-0.999806	1.65447e-22	1.0665e-20
FRMPD1	0.0783509	0.684091	0.769976
GBA2	-0.34721	1.12375e-09	9.25229e-09
NDST1	-0.492166	5.74789e-14	9.35808e-13
ASNS	0.244324	0.0660122	0.116192
AP3M2	-0.00380851	0.959238	0.971996
CNGB1	-0.406349	0.0822276	0.14028
ST6GALNAC2	-0.719283	8.78223e-09	6.26755e-08
CHAT	0.12016	0.801998	0.860122
PABPC1	-0.126201	0.0691262	0.120847
TESK2	-0.602211	3.02492e-08	1.97464e-07
CFAP20	-0.0548301	0.219291	0.318905
CSNK2A2	-0.114106	0.006145	0.0145327
PTPN21	-0.181708	0.0200484	0.0414216
EIF2B3	-0.0437058	0.288229	0.397144
CAMK2A	-0.0469358	0.782433	0.845705
TCOF1	-0.363231	8.06808e-12	9.30611e-11
CDC42	0.0892236	0.0221818	0.0452261
OSBPL3	0.373117	9.4067e-05	0.000331307
EPHA8	-2.18191	4.13146e-19	1.48763e-17
SLC12A3	0.995364	4.60362e-09	3.43703e-08
RAD18	0.160078	0.00988909	0.0222096
ATP2B1	1.0462	6.32614e-30	1.41691e-27
TRPM5	0.307376	0.165261	0.253115
NCK2	-0.241968	0.000486382	0.00148438
MAP4K4	0.211377	0.00118627	0.003321
MGAT4A	0.558344	3.36268e-11	3.51741e-10
RPL31	0.0209244	0.757431	0.827297
WDR1	-0.333126	7.58248e-11	7.50187e-10
SNX13	0.441974	3.58669e-10	3.18885e-09
MS4A12	-0.0354929	0.88074	0.91795
ARHGAP10	0.0670724	0.343779	0.456771
RPS6KA2	-0.103176	0.46841	0.579994
ING3	0.284998	4.20735e-06	1.89541e-05
VASH1	0.205375	0.0356315	0.0683924
LMCD1	-0.131762	0.105097	0.173127
BUD23	-0.0793199	0.177815	0.268913
SEL1L	0.131916	0.0412573	0.077712
TRIP13	-0.27233	0.00134506	0.0037149
ATP6AP1	-0.733852	6.21624e-23	4.30081e-21
TCF3	-0.0631169	0.308333	0.419092
TRIB2	-0.267498	0.000769518	0.00225425
DAZAP1	-0.136904	0.000599754	0.00179636
MBD3	-0.433027	3.91828e-11	4.05154e-10
PRLH	-0.43864	0.139559	0.219787
HLTF	0.293639	0.000178221	0.000596286
FAM50A	-0.382987	1.04017e-09	8.61067e-09
FAM3A	-0.367138	6.95577e-09	5.03845e-08
CPSF1	-0.269593	4.34574e-06	1.95398e-05
MYO3B	0.933849	3.10219e-07	1.70715e-06
CYBRD1	0.67739	1.07147e-08	7.52876e-08
CDH19	1.12727	5.65317e-13	7.79528e-12
PDCD2	0.021153	0.686407	0.77186
SLC6A15	-0.221905	0.111679	0.182235
RDH11	-0.145009	0.0179324	0.0375607
PRKACA	-0.298974	2.51378e-09	1.96251e-08
ADGRL1	-0.112191	0.197642	0.293293
SPP2	1.12623	0.0171939	0.0362168
ACTN1	-0.452152	1.81808e-07	1.04051e-06
ZFYVE26	-0.458605	9.27535e-15	1.70497e-13
RPS6KA6	0.0908717	0.689774	0.77457
EPN2	0.157003	0.0120716	0.0264781
PTPN18	-0.306403	2.84725e-06	1.31757e-05
LIMS2	-1.46812	1.19519e-24	1.11225e-22
ASIC4	0.409091	0.039789	0.0753258
SPEG	0.630416	6.84777e-05	0.000248297
LNX1	0.342649	0.00065689	0.00195245
ALDH3A2	0.275086	8.37367e-05	0.000297995
TFRC	-0.331669	0.0014211	0.00390587
SREBF1	-0.422061	2.3425e-07	1.31762e-06
TRPC5	0.154774	0.570342	0.673618
AFF4	0.0961478	0.123731	0.198645
UBE2D1	0.412165	3.47085e-14	5.87525e-13
MPP5	0.162413	0.0134148	0.0291167
RHOBTB1	-0.442114	5.76811e-08	3.59885e-07
SMC1A	-0.0194064	0.680823	0.767452
HSD17B10	-0.477463	1.35886e-15	2.85785e-14
MARK2	-0.212455	6.6797e-06	2.9132e-05
HMMR	0.53209	4.38127e-08	2.79157e-07
CHFR	-0.132074	0.0114012	0.0251637
TRHDE	3.27747	1.94696e-31	5.67538e-29
P4HA2	0.0966681	0.328688	0.440845
FCGR2B	0.911026	8.35259e-14	1.32293e-12
NFATC3	0.217018	0.000407582	0.00126453
TRNT1	0.241608	1.34576e-05	5.55336e-05
ACADVL	-0.135725	0.0315027	0.0614855
STK10	0.151651	0.0426397	0.0799662
FBXW11	-0.0170039	0.732478	0.807855
ACAP1	1.0592	2.30088e-13	3.37462e-12
CRMP1	-0.249413	0.0141043	0.0304184
EVC	-0.398127	3.30352e-07	1.80866e-06
DERL2	0.00780374	0.860686	0.902888
SIDT1	1.01448	1.14324e-14	2.07237e-13
NDE1	0.159844	0.01116	0.0247001
IRAG1	0.358557	0.00035047	0.00110157
TMEM38A	-0.0755116	0.546584	0.652655
AP1M1	-0.519782	7.89967e-22	4.47392e-20
PVR	-0.218566	0.00261761	0.0067905
XRCC1	-0.296694	2.6247e-09	2.04347e-08
SCARB1	-1.22885	2.67558e-25	2.72675e-23
CYP2W1	-0.341238	0.0506933	0.0926565
MCM2	-0.418641	3.95846e-08	2.53848e-07
MOV10L1	-0.882613	7.3063e-08	4.49071e-07
PANX2	-0.542936	0.00232415	0.00609787
SELENOO	-0.357032	1.92675e-08	1.29751e-07
TP63	-0.105854	0.592536	0.692669
ALPK1	0.461706	2.69715e-11	2.85364e-10
LLGL2	-0.47718	1.88564e-05	7.56775e-05
PDE8A	0.127884	0.0599613	0.106971
CLCN4	0.60675	0.000140657	0.000480375
NLE1	-0.475045	2.02007e-16	4.86536e-15
SDHA	-0.622318	3.59743e-22	2.15758e-20
SMARCE1	0.110483	0.0243979	0.0491903
FNDC8	0.406758	0.00172907	0.00467151
GSDMB	0.954054	4.79679e-18	1.46731e-16
KDM5A	0.250706	1.60146e-06	7.76519e-06
ADAM11	-1.94409	9.69803e-32	2.98038e-29
PPP2R3A	-0.0296663	0.701569	0.783928
FERMT2	0.106244	0.153516	0.238106
ABCB11	1.13026	3.35356e-09	2.56906e-08
DHRS9	0.565303	0.000573469	0.00172545
CD5L	0.194293	0.436059	0.549338
PTGS2	0.898757	1.98092e-07	1.12719e-06
IGF2BP2	-0.120817	0.273102	0.380143
MAP3K13	-0.0565835	0.363491	0.477381
ST6GAL1	0.511143	2.80936e-07	1.55703e-06
TBX21	0.940559	8.24582e-09	5.91028e-08
VDAC1P1	-0.315314	0.00110814	0.00312477
FRY	0.201546	0.0405894	0.0766469
PICALM	0.158189	0.00355419	0.00893237
NSF	-0.0823861	0.0742162	0.128381
GLI2	0.600426	7.22373e-05	0.000260699
CLASP1	-0.164085	0.000508536	0.00154758
MRPS34	-0.460721	2.67586e-14	4.60824e-13
NOTCH3	-0.308557	0.00746883	0.0173023
CLNS1A	0.11228	0.149064	0.232301
PPP2R2C	-0.149967	0.567438	0.67121
TEAD2	-0.145839	0.070343	0.122639
EED	0.229565	5.1154e-06	2.27629e-05
CDHR2	-0.405606	0.0013749	0.00378992
SNCB	-2.09243	7.22655e-21	3.48952e-19
TSG101	-0.035448	0.383418	0.497725
NCBP3	0.0419341	0.385238	0.499472
ATP2A3	0.462013	0.00121704	0.00339514
CA12	0.831867	1.67051e-05	6.78403e-05
MGLL	0.719298	2.06845e-08	1.38774e-07
NTN4	0.854101	2.06948e-08	1.38796e-07
BCS1L	-0.333564	1.66317e-12	2.14562e-11
NUAK1	0.309451	0.00739161	0.0171384
DPP8	0.213669	8.8413e-05	0.000313006
SLC24A1	0.0182971	0.77372	0.839547
ZNF532	0.0265298	0.786169	0.848425
SCARF1	0.661484	2.95692e-16	6.9118e-15
LMAN1	0.334831	5.27977e-08	3.31346e-07
HACD3	-0.145578	0.0123757	0.0270718
IPCEF1	1.578	2.02304e-28	3.50224e-26
ZZEF1	-0.150665	0.00112751	0.00317352
NOX3	-0.842247	0.00390335	0.00970976
ENO1	-0.384533	6.11037e-08	3.79686e-07
SLC12A1	-0.287358	0.0935565	0.156906
MYDGF	0.0870063	0.168399	0.257077
ANO8	-0.168913	0.010312	0.0230588
TUBE1	0.437386	9.05489e-11	8.8308e-10
ARHGEF10L	-0.0900359	0.213555	0.31221
TXK	1.14176	5.78882e-19	2.0327e-17
WSCD2	2.03	2.39279e-20	1.06226e-18
KCNQ2	-1.03524	8.47461e-05	0.00030137
TACR2	-0.618721	1.33497e-09	1.08717e-08
ACTR6	0.234061	3.30383e-06	1.51174e-05
TIPIN	0.0576864	0.305594	0.416278
SRI	0.0919469	0.0353887	0.0679954
EIF4G3	0.0857637	0.101872	0.168528
NUP37	-0.00915632	0.837673	0.886345
SEMA3A	1.47274	5.9418e-13	8.1564e-12
GTSE1	-0.229483	0.00540322	0.0129601
SEMA3C	0.338061	0.010781	0.0239953
TTC38	-0.18057	0.0011883	0.00332572
ACAT1	-0.013783	0.822955	0.875211
GRAMD4	-0.578914	5.88184e-13	8.08249e-12
CELSR1	-0.943984	4.90066e-13	6.82649e-12
WNT8B	0.261589	0.132456	0.210195
ZNF638	0.351436	2.43868e-12	3.06723e-11
SLC25A40	0.42183	3.06644e-10	2.75037e-09
TIMM21	-0.0887874	0.0551003	0.0995304
ADD2	-0.00178824	0.992337	0.994091
FGF4	-0.200469	0.614335
RASAL2	-0.0534681	0.444073	0.557062
VPS9D1	-0.183119	0.00636968	0.0150041
ZNF37A	0.270749	0.000138351	0.000473111
MARK3	0.152622	0.000504277	0.00153533
SLC25A3	-0.454299	8.1362e-23	5.49492e-21
FNDC3B	0.4825	1.1296e-11	1.26789e-10
FOSL2	-0.210558	0.0322419	0.0627428
CACNG5	1.01323	0.000304482	0.00096947
CACNG4	-0.115821	0.650181	0.742149
FRYL	0.278534	2.32777e-06	1.093e-05
TMEM131	0.135321	0.00091545	0.00263406
FSCN1	-0.140594	0.310153	0.421071
ACTB	-0.318134	1.35936e-07	7.94726e-07
MOCOS	-0.301503	0.0224812	0.0457611
PLD1	-0.513754	8.79466e-08	5.32949e-07
ATP12A	-1.16491	2.23175e-06	1.05203e-05
WDR62	-0.511161	2.10839e-11	2.26272e-10
DLG1	0.119603	0.0344633	0.0664459
RAB7A	-0.390727	5.39145e-16	1.20145e-14
BCAP29	0.668159	3.57177e-20	1.53578e-18
SEC31B	0.53402	4.16046e-06	1.87557e-05
SART3	-0.125933	0.000432193	0.00133317
ARHGAP15	0.792617	1.01787e-08	7.18492e-08
TUBA3D	0.101323	0.291282	0.40068
PAX2	0.388282	0.13207	0.209725
EXOSC7	-0.264978	1.08238e-08	7.60008e-08
KIFAP3	0.217584	0.000398959	0.00124069
MKRN2	-0.0239056	0.551725	0.657259
MCM6	-0.0192152	0.730332	0.805982
REXO2	0.171724	0.00463206	0.0113047
RBM7	0.450144	4.35693e-14	7.2218e-13
RBMS2	-0.044481	0.434844	0.548278
BAZ2A	-0.099954	0.0419592	0.0788803
PTPN23	-0.708667	2.25642e-31	6.52945e-29
MLH1	-0.0579976	0.13891	0.218851
UNG	-0.404816	8.07635e-16	1.75344e-14
FMO4	-0.0617574	0.4753	0.58671
KLHL20	0.244136	2.19308e-05	8.69078e-05
RGS11	-0.368764	0.0537885	0.0974897
SLC46A1	-0.320864	1.17711e-05	4.91212e-05
PLXNA2	-0.16616	0.164859	0.252635
SPAG5	-0.235781	0.000429468	0.00132528
ANKRD13A	0.29882	1.33908e-09	1.09007e-08
TPD52	0.0932404	0.32341	0.435356
ACACB	-0.400347	5.08069e-06	2.26237e-05
TRAF4	-0.346758	2.45184e-07	1.37367e-06
PAG1	-0.411955	5.40414e-05	0.00019935
GPATCH1	-0.149745	0.000214916	0.000706068
ICAM3	0.807222	1.68315e-06	8.12751e-06
NT5C2	0.0953907	0.109274	0.178957
MCAM	-0.298425	0.0175983	0.0369528
GPC4	0.926483	2.29909e-07	1.29523e-06
MBNL3	0.845303	1.24572e-15	2.63248e-14
CAMSAP3	-1.4212	9.2441e-12	1.0546e-10
RAP1GAP	-0.85269	3.00916e-11	3.16265e-10
XAB2	-0.497392	9.24937e-16	1.98744e-14
ARHGEF1	0.0111983	0.854199	0.89807
STXBP2	-0.334094	0.00363591	0.0091131
MAP2K7	-0.327417	7.28287e-14	1.16703e-12
NMRK2	-2.76832	2.79426e-20	1.22675e-18
DGKD	0.0658471	0.274824	0.382111
CTTNBP2	-0.243324	0.144695	0.226525
ACTL6B	-0.0532339	0.810168	0.866002
RARB	0.328461	0.0292424	0.0576415
TOP2B	0.297742	1.82003e-07	1.04148e-06
TM9SF3	0.173501	0.000395743	0.00123127
NFKB2	0.0237383	0.762647	0.831214
UBE2T	-0.155956	0.0281023	0.0556294
PPP1R12B	0.714223	4.17858e-10	3.68042e-09
DNAJC10	0.398067	1.27296e-12	1.67048e-11
GTF3C1	-0.444355	2.35794e-17	6.47804e-16
IL4R	0.333186	0.000666448	0.00197834
USP33	0.31133	6.54196e-08	4.04791e-07
PAK3	1.0382	5.06168e-08	3.18617e-07
CAPN6	1.23858	1.30301e-07	7.64375e-07
DCX	0.5081	0.110887	0.181159
SNRPA	-0.358779	5.99128e-11	6.02685e-10
SPAG6	0.274792	0.196337	0.291659
EXOSC5	-0.384367	4.84523e-09	3.60586e-08
DYNC1I2	0.107962	0.0120308	0.0264077
APBB1IP	0.950727	3.03724e-12	3.74637e-11
LRCH4	-0.214233	0.000360193	0.00112988
FAM76B	0.453411	3.64759e-09	2.77766e-08
SIRT6	-0.268553	8.28733e-06	3.55643e-05
TYR	-0.847254	7.41917e-07	3.80942e-06
POLD3	-0.00514321	0.923257	0.947884
ACTN2	0.349924	0.0535856	0.0971708
CAPZB	-0.13231	0.00531148	0.012764
GPR137B	-0.61412	3.43629e-10	3.05924e-09
NAALAD2	0.966425	7.44853e-14	1.19016e-12
JADE1	0.177012	0.0172376	0.0362986
SLC25A43	0.161724	0.0049933	0.0120866
UBE2A	0.149097	0.000310816	0.000987893
FGFR1	0.617536	1.83218e-06	8.78293e-06
FKBP6	-0.0501403	0.763793	0.832092
SMC1B	0.0857787	0.621271	0.717376
FBLN1	-0.555492	2.27464e-05	8.98703e-05
ITGA8	1.13706	4.8386e-14	7.9627e-13
CST7	0.97579	6.78282e-09	4.92397e-08
MAP2	0.302623	0.0503607	0.0921319
PIAS2	0.157524	0.000759796	0.00222873
AMPH	-0.257691	0.181028	0.272857
ARAF	-0.259951	2.62221e-07	1.46148e-06
MCCC1	-0.0352839	0.514423	0.623288
LAMP3	0.779512	1.10571e-08	7.74788e-08
FAP	0.843531	3.02073e-11	3.17397e-10
NEBL	0.944156	5.2263e-08	3.2825e-07
ACER3	0.479173	3.90442e-09	2.95282e-08
UBE2K	0.0403304	0.323003	0.434954
PIK3C3	0.118814	0.0356833	0.0684851
N4BP2	0.586242	2.2064e-10	2.02244e-09
TIGAR	-0.212788	0.000754671	0.00221534
TULP3	-0.56065	2.02695e-18	6.54901e-17
SYNJ2	0.363737	5.64561e-05	0.000207716
ADCY2	-1.58492	8.52044e-12	9.78801e-11
PPP2R5C	0.0785802	0.037839	0.0720851
PMS2P1	-0.12049	0.0154299	0.032905
RBFOX1	0.379533	0.134552	0.213009
GNB1	-0.149245	0.000418344	0.00129458
HOXA9	-0.211896	0.209725	0.307791
EDN1	0.234692	0.0486259	0.0894245
MLLT10	-0.0117436	0.842562	0.889572
ZCWPW1	0.00996594	0.901342	0.932412
ADCYAP1R1	-0.0230524	0.882058	0.918888
FGF20	0.527961	0.0384879	0.0731631
P2RY10	1.83455	2.45532e-24	2.1679e-22
ITM2A	1.04387	3.84906e-11	3.98829e-10
NRDC	0.0978503	0.0103686	0.0231709
VDAC3	-0.0595448	0.205871	0.303144
PCM1	0.480909	1.19196e-13	1.8344e-12
TNRC6C	0.0693507	0.259199	0.364813
CBFA2T2	-0.175582	0.000195586	0.000648529
BRINP1	0.483855	0.044869	0.083566
ITCH	0.26803	6.19809e-07	3.23057e-06
PKD2L2	0.312495	0.00312418	0.00795626
TP53INP2	-0.604733	1.00033e-14	1.82752e-13
SDF4	-0.157559	0.0074364	0.0172322
MYH7B	0.158349	0.10816	0.177412
BPIFB2	0.217765	0.490251	0.600603
TP73	-0.449716	0.00361703	0.00906924
TOLLIP	-0.628055	2.28632e-20	1.02071e-18
UBE2D4	-0.164966	0.00123353	0.00343631
CLUL1	0.016003	0.936498	0.956623
RUNX1T1	0.492913	0.000226223	0.000740027
CDH17	0.536636	0.00084569	0.00245382
THOC1	0.20173	0.000952977	0.00272838
FKBP7	0.138708	0.0832978	0.141904
OSBPL6	0.552946	1.57855e-05	6.43166e-05
SLC1A3	0.921663	2.69281e-13	3.90039e-12
XRCC5	-0.0725904	0.0569903	0.102468
LXN	0.46554	3.96145e-05	0.000149669
SP140	1.43373	1.40593e-20	6.481e-19
MKNK1	-0.0523001	0.180062	0.27171
TNS1	-0.503598	3.00917e-05	0.000116216
REXO1	-0.349466	1.32993e-10	1.26013e-09
SAR1A	0.0499754	0.225816	0.326629
CDC14A	0.440663	1.43986e-09	1.16473e-08
RAPGEF3	0.162793	0.178824	0.270203
CEACAM1	-0.496522	0.00234652	0.0061533
SENP1	0.176072	0.000181386	0.000606006
DUSP13	0.00994714	0.970104	0.979692
CIC	-0.319083	1.0617e-08	7.47071e-08
LIPE	-0.640776	8.54533e-10	7.15764e-09
FDFT1	-0.367724	3.50686e-07	1.9118e-06
PAFAH1B3	-0.676582	5.1097e-18	1.55822e-16
OPHN1	0.0408855	0.734119	0.809283
AFM	0.511592	0.406459	0.520416
KIF22	-0.30316	1.8637e-08	1.2589e-07
SCGN	-1.53944	1.94341e-06	9.27911e-06
CARMIL1	-0.248499	0.00909331	0.0206257
PGM1	-0.39847	1.34415e-06	6.60315e-06
DDX1	0.0603925	0.180207	0.271867
DNM2	-0.322576	1.82641e-11	1.98102e-10
EPB41L2	0.447115	8.35344e-08	5.08076e-07
RIMS1	0.762939	0.00471286	0.01148
MOXD1	0.00360058	0.985168	0.989411
STX7	-0.0391006	0.632425	0.727015
RABL2B	-0.155849	0.00191921	0.00513604
KEAP1	-0.1179	0.00702618	0.0163947
DDX43	0.256755	0.290309	0.399507
PTPRH	-0.066402	0.603006	0.701904
DCT	-0.57525	0.00742867	0.0172153
SLC35C2	-0.452528	6.71172e-18	2.0127e-16
CRYBG3	0.416145	4.03177e-06	1.82045e-05
EPHA6	0.898383	0.000969704	0.00277146
SCTR	0.361318	0.0568722	0.102293
RFX3	0.564446	2.47564e-10	2.25515e-09
RIF1	0.458518	3.45132e-12	4.21256e-11
RAB21	0.273142	8.42649e-07	4.28392e-06
SLC4A4	0.615328	0.000319944	0.0010143
SMARCA2	0.239395	0.000497885	0.00151669
RDH8	-1.34812	1.7432e-06	8.38887e-06
SESN1	0.192191	0.0160672	0.0341007
MID2	0.0290137	0.862676	0.904425
DNAAF6	-0.202491	0.645989
COL5A3	-0.161095	0.263768	0.369774
SRCAP	-0.301305	5.19155e-11	5.27322e-10
PUM3	0.127379	0.081074	0.13858
CPB2	0.039333	0.789656	0.850788
CHRNA3	-0.404985	0.0120889	0.0265117
KCNN2	-1.07848	2.19698e-09	1.72914e-08
CNOT4	0.0532358	0.160263	0.246861
PSEN1	-0.148564	0.000955289	0.0027344
CPOX	0.114204	0.0667548	0.117301
CLDND1	0.354704	8.1344e-13	1.09575e-11
MOK	-0.0182783	0.85556	0.899033
HSP90AA1	0.0239211	0.736562	0.811243
RBL1	0.267915	1.37291e-05	5.65488e-05
DLGAP4	-0.346958	2.50351e-10	2.2774e-09
IGSF9B	0.244806	0.152201	0.236353
CFHR2	-0.101134	0.954826
CROCCP3	0.384932	3.69308e-06	1.67707e-05
NDC80	0.23585	0.00348792	0.00878105
AP4E1	0.265313	4.60046e-06	2.06243e-05
RSBN1	0.391785	2.51226e-12	3.15177e-11
MAGI3	0.22318	0.00206342	0.00547794
CXCL2	0.991176	7.66785e-10	6.47326e-09
AFP	2.9881	1.54191e-07	8.92505e-07
COL4A4	0.787137	4.47263e-08	2.84429e-07
TCF7	0.229329	0.0755365	0.130323
OSTM1	0.0176949	0.855233	0.898809
CDH7	-0.301356	0.311756	0.422741
IMPG2	0.384224	0.000167582	0.000563639
PCNP	0.370389	2.41647e-11	2.5704e-10
EXD2	-0.190227	0.000231335	0.000755753
ARG2	0.292397	0.00575117	0.0136994
MEF2C	0.431989	2.73805e-06	1.27075e-05
PTPRC	1.93767	6.15833e-36	3.53827e-33
CACNA1S	-0.0786882	0.719321	0.797873
PKP1	-2.09286	5.85712e-14	9.51248e-13
UBA5	0.245128	5.079e-07	2.68971e-06
STK17B	1.34563	2.57808e-35	1.34481e-32
CDC14B	0.0486761	0.462031	0.574013
ZNF510	0.22987	0.00077634	0.00227105
LRP2	0.937731	7.88818e-05	0.000282212
ZNF506	0.322015	1.55292e-06	7.53997e-06
JMJD4	-0.484052	5.94051e-15	1.12413e-13
DUSP12	-0.0208992	0.653518	0.74487
AACS	-0.355603	6.83701e-07	3.53201e-06
DELE1	-0.2233	2.75096e-06	1.27614e-05
SLC13A1	0.659393	0.10036	0.166489
CADPS2	0.245419	0.0663542	0.116695
PCDHB4	0.0501637	0.748413	0.820431
PCDHA6	0.801915	0.000498134	0.00151733
PCDHGA2	0.296844	0.0449156	0.0836254
HSPB11	-0.00369978	0.943736	0.961341
PHLPP1	-0.255871	0.00296967	0.00760821
ATP8B1	0.367676	0.000583563	0.0017533
IL12RB2	-0.376733	0.0143206	0.0308246
SMARCD3	-0.181718	0.043191	0.0808206
WDR70	0.0869755	0.0701263	0.122325
FYB1	1.23668	1.56881e-22	1.0194e-20
MPP4	-0.359176	0.0479569	0.0883542
STRADB	-0.300663	8.20938e-05	0.000292568
BZW1	0.307709	1.05473e-08	7.42697e-08
PGR	0.820033	7.05882e-09	5.10936e-08
C1QTNF3	1.5053	2.66588e-10	2.41458e-09
ME2	0.125242	0.0372526	0.071108
C5orf22	-0.428814	9.01425e-08	5.44177e-07
CCNT2	0.425786	9.90966e-12	1.1231e-10
FAM135A	0.434451	2.81111e-08	1.84723e-07
COL19A1	1.31412	2.94687e-08	1.9275e-07
EPB41L3	-0.441079	2.64601e-05	0.000103267
COBLL1	0.460742	5.11707e-07	2.70844e-06
DLG3	0.684961	1.42616e-12	1.85677e-11
KCNK2	0.292528	0.0619418	0.109999
SERTAD4	0.461248	0.0062183	0.0146833
TRAF5	0.317235	4.41391e-05	0.000165345
MRPL22	-0.130429	0.00892148	0.0202811
GEMIN5	-0.143209	0.00405369	0.0100403
OPRK1	0.578956	0.0648313	0.11445
NFE2L1	-0.292969	1.81895e-09	1.45004e-08
SEMA5B	-0.0361023	0.723711	0.801458
GSK3B	-0.140071	0.00162075	0.00440602
ITGB5	-0.0159546	0.861314	0.903331
ERC1	-0.307029	8.60594e-06	3.68222e-05
XPO1	0.226343	2.17012e-05	8.6101e-05
LINC01587	0.903013	2.32478e-05	9.17508e-05
RNF13	0.305657	7.88407e-07	4.03246e-06
TRPM3	0.740224	6.98319e-07	3.60143e-06
PALB2	-0.0449758	0.317931	0.429498
DOP1A	0.429909	3.28151e-10	2.93e-09
LYRM2	0.240081	0.0002537	0.000821505
BCKDHB	0.0674751	0.285388	0.393843
KAT6A	0.179635	0.00118219	0.00331144
TUT7	0.694588	2.74777e-22	1.68332e-20
ULK2	-0.0620952	0.414643	0.528489
GRHL2	-1.08276	0.000310896	0.000988069
TNPO1	0.117909	0.0439687	0.0820859
PLOD1	-0.196955	0.00964091	0.0217211
P2RX5	1.16412	4.00606e-10	3.54026e-09
ITGAE	0.196031	0.00205753	0.00546414
DIS3	0.247318	6.58989e-05	0.000239701
PIBF1	0.626127	5.3105e-12	6.28447e-11
TDRD3	-0.345687	0.00428342	0.0105578
AC000061.1	-0.322703	0.760332
NUFIP1	-0.0453049	0.395454	0.509485
PDS5B	0.370594	2.3764e-07	1.33499e-06
OXCT1	0.228045	0.0135527	0.0293872
RRAGB	0.164373	0.00719717	0.0167405
EPYC	1.18217	5.04206e-06	2.24668e-05
CYLD	0.865784	1.07778e-36	7.12125e-34
SLC27A5	-0.54164	3.79482e-09	2.87817e-08
ZNF324	-0.354571	2.91136e-15	5.78079e-14
ZNF671	0.0798801	0.420831	0.534862
ZNF416	-0.335408	4.3563e-10	3.82759e-09
ZNF586	0.245164	1.05776e-06	5.29401e-06
ZNF446	-0.316994	2.12228e-10	1.94985e-09
ZNF264	0.0839187	0.0648588	0.114486
RPS5	-0.432117	2.70835e-10	2.44689e-09
FAT1	-0.129569	0.174058	0.26425
YTHDC1	0.129108	0.000200415	0.000662934
CHMP2B	0.186084	0.000954247	0.00273162
SMAP2	0.322635	1.35276e-06	6.63971e-06
PPIE	-0.0947223	0.0222868	0.0454215
ZMPSTE24	0.0584012	0.222516	0.322778
STARD7	-0.118088	0.000849474	0.002463
NOA1	-0.204691	7.7295e-05	0.000276947
REST	0.426009	6.11097e-13	8.37702e-12
HAL	-1.03338	1.60824e-05	6.54457e-05
SSH1	-0.266958	9.99202e-06	4.22577e-05
GSTP1	-1.71049	1.29513e-44	3.94956e-41
APLP2	0.343533	1.44784e-05	5.93939e-05
FAM234B	-0.483706	2.6558e-10	2.40655e-09
SLCO1A2	0.642614	0.0119381	0.0262188
WBP11	-0.39105	2.29562e-14	3.98632e-13
EIF3I	-0.270548	4.23554e-09	3.18259e-08
NKAIN1	-0.584359	0.00118034	0.00330743
COL16A1	0.455224	3.37073e-05	0.000129023
TXLNA	-0.249736	8.7255e-08	5.29548e-07
APOB	0.126243	0.698128	0.781272
NCOA1	0.267929	5.11851e-08	3.2199e-07
AGBL5	-0.411089	1.0697e-15	2.27682e-14
EFR3B	-0.224389	0.013281	0.0288516
KIF3C	-0.582389	2.11992e-11	2.27325e-10
RAB10	0.184118	4.46313e-06	2.00381e-05
GCKR	1.17575	1.27725e-11	1.42075e-10
HADHA	-0.43709	2.26886e-19	8.56634e-18
MAPRE3	0.028036	0.728426	0.80462
CAD	-0.506107	3.06113e-16	7.13437e-15
CD59	0.165233	0.0476799	0.0879296
CD82	-0.0548753	0.678067	0.765086
BCORL1	-0.356668	5.96867e-08	3.71521e-07
ATRX	0.564114	7.43682e-17	1.91944e-15
AK6	0.163465	0.000810825	0.00236286
FCN1	0.624279	5.97246e-05	0.000218909
MYNN	0.388998	1.12703e-11	1.26536e-10
MECOM	0.73783	1.87181e-12	2.39452e-11
SCAMP1	0.3907	6.42986e-09	4.6849e-08
PREP	-0.126937	0.0561222	0.101105
HACE1	0.241886	0.000283665	0.000908957
SEH1L	0.00722098	0.891837	0.925735
WDR47	0.194275	0.00229088	0.00602154
WDFY1	-0.113339	0.147747	0.230598
OVGP1	0.354205	0.00126739	0.00352222
SLC25A24	0.355867	2.35642e-06	1.10554e-05
MAP3K4	0.231984	0.000891874	0.00257332
PILRA	0.310134	0.0109436	0.0243053
IGSF9	-0.57318	0.00842892	0.019302
ABCB1	0.750118	3.10139e-08	2.02123e-07
ZNF213	-0.476994	4.45478e-16	1.00745e-14
AKR1B1	-0.282171	0.00130546	0.0036151
CPNE3	0.210761	0.00108344	0.0030634
RRN3	0.0542698	0.164804	0.25257
CTTN	-0.450942	1.79606e-09	1.43352e-08
WNT11	-0.741824	5.17286e-05	0.000191478
MTIF2	0.0238836	0.623269	0.719222
DDHD2	0.187191	0.00229334	0.00602699
TTC39A	-1.04094	6.30419e-08	3.913e-07
EPS15	0.0908123	0.0993625	0.165086
ORC1	-0.315541	0.000100597	0.00035274
MGST2	0.0346254	0.744383	0.817291
CHERP	-0.422631	7.53988e-19	2.60603e-17
ATG16L1	0.261047	3.21798e-06	1.47518e-05
USP40	0.0192919	0.688744	0.77372
POMGNT1	-0.515525	9.54834e-20	3.81972e-18
RAD54L	-0.244176	0.00276829	0.00713936
MAST2	-0.436195	3.34381e-14	5.66988e-13
DNAJA1	-0.0133599	0.824463	0.87622
B4GALT1	-0.0713836	0.320757	0.43252
CHMP5	0.272625	3.25024e-06	1.48911e-05
NFX1	-0.181297	5.22393e-05	0.00019317
AQP6	-0.960924	1.44626e-07	8.41931e-07
DIMT1	0.177514	7.53336e-05	0.000270788
IPO11	0.159835	0.00720177	0.0167496
FOLH1	1.05311	8.77165e-10	7.33945e-09
EIF2AK1	-0.218016	1.04863e-06	5.25231e-06
NME8	1.25526	2.66578e-12	3.33067e-11
EPDR1	-0.0480873	0.748352	0.820431
SNX10	0.776882	5.79283e-12	6.81255e-11
SEPHS1	-0.298048	6.04547e-11	6.07828e-10
MRPL28	-0.554629	2.03404e-18	6.56658e-17
HBQ1	-1.49235	7.1581e-14	1.14889e-12
ITPKC	-0.214621	0.000657888	0.00195468
CEACAM6	-1.01563	0.00270734	0.00699719
FAT2	-1.05734	1.29472e-07	7.59965e-07
RBM22	-0.0433539	0.266473	0.372827
TMED2	0.167426	0.000695364	0.00205571
ERO1B	0.434584	1.6523e-07	9.50987e-07
ZFAND6	0.177696	0.000157792	0.000533564
HSD17B2	-0.978066	2.88844e-06	1.33476e-05
TXLNG	0.291128	6.02079e-07	3.14394e-06
PPEF1	-0.231653	0.175318	0.265805
LAT2	0.935896	2.02495e-17	5.64536e-16
HUWE1	-0.148455	0.000849129	0.00246254
ZW10	0.196865	6.67587e-05	0.00024245
ALG9	-0.204376	0.000254868	0.000824747
MYBPC2	1.25304	8.36507e-13	1.12644e-11
NOX4	0.59032	0.000305004	0.000971055
ACOX3	-0.40512	2.334e-14	4.05119e-13
MTMR2	0.0378522	0.545198	0.651353
PPP1R15A	-0.134915	0.0583164	0.104464
HSD17B14	-0.987097	3.31506e-15	6.50284e-14
TRIP6	-0.55176	1.99591e-11	2.15016e-10
ACHE	0.434491	0.00183866	0.00494282
FTL	-0.514372	2.0297e-08	1.36313e-07
SRRT	-0.259923	7.05427e-11	7.02133e-10
BAX	-0.471306	2.79031e-14	4.79493e-13
NLK	-0.149179	0.0183662	0.0383701
PIGS	-0.19193	0.00085558	0.00247925
ADAMTS2	-0.536845	4.88838e-05	0.000181711
TMPRSS11E	-0.336691	0.209925	0.308004
ATXN7L3	-0.248119	1.57797e-10	1.4768e-09
PGS1	-0.238167	3.70069e-07	2.01111e-06
PSMC5	-0.264585	4.65685e-08	2.95056e-07
UIMC1	0.122336	0.00689077	0.016108
CETP	1.10889	3.05491e-10	2.74126e-09
MMP2	-0.423756	0.00988873	0.0222096
MT3	1.08315	1.49477e-05	6.1167e-05
LPCAT2	0.245461	0.016223	0.0343928
GNAO1	-0.857349	1.67751e-07	9.64516e-07
OGFOD1	-0.0329355	0.43003	0.543678
SH3BP2	-0.0467526	0.384311	0.49855
NOP14	-0.157312	0.000517737	0.00157317
ADD1	-0.253542	8.55321e-09	6.11512e-08
L2HGDH	-0.0655813	0.326541	0.438633
TXNDC16	0.274823	0.000461486	0.00141538
RTRAF	-0.212456	1.79954e-07	1.03064e-06
NID2	0.464051	0.000129696	0.00044563
GMCL1	0.323173	2.79357e-08	1.83693e-07
SF3B2	-0.275473	4.47298e-10	3.92489e-09
KLHL42	0.0608707	0.270435	0.377093
GNAS	0.0144747	0.831843	0.881777
DNM1L	0.201657	0.000348156	0.00109464
PTHLH	0.572688	0.000615867	0.00184017
PHACTR3	-0.648311	0.000765934	0.00224474
ERGIC2	0.480037	1.63077e-15	3.39193e-14
TFAP2C	1.08324	2.67843e-09	2.07999e-08
AURKA	-0.262684	0.000347781	0.00109355
CASS4	1.39686	2.37673e-31	6.77865e-29
PIR	-0.489022	9.73868e-05	0.000342239
AAMDC	-0.622352	4.7938e-08	3.02958e-07
RFX2	-0.0604323	0.478304	0.589592
METTL2A	-0.167671	9.74225e-05	0.000342304
SULT2B1	-1.74321	4.73641e-17	1.25431e-15
ALG6	-0.0498332	0.336964	0.449648
CNOT3	-0.35457	1.53259e-16	3.77144e-15
GP6	0.298926	0.0873559	0.147833
PTPN4	0.41551	4.5011e-13	6.30313e-12
DDX18	0.158188	0.0015012	0.00410694
KHSRP	-0.497898	2.67009e-22	1.63859e-20
GNA11	-0.319061	2.5943e-09	2.0206e-08
ASAP3	-0.314895	0.00280772	0.00723305
EDEM2	-0.226287	7.3717e-05	0.000265483
DNMT3B	-0.302611	0.000559866	0.00168961
REM1	1.84172	3.09582e-28	5.22258e-26
TPX2	-0.202772	0.00454947	0.0111305
FER1L4	1.49371	1.02259e-20	4.83768e-19
PDRG1	-0.298814	1.42079e-11	1.56941e-10
EPB41L1	-0.126143	0.217193	0.316559
SLC15A1	-0.495534	0.0722564	0.125483
DOCK9	-0.194259	0.0106695	0.0237791
ANKRD10	0.473219	1.10639e-09	9.11694e-09
TGDS	0.36375	9.76846e-05	0.000343103
DOCK3	0.230502	0.16144	0.248404
C3orf18	-0.149595	0.204317	0.301259
COQ9	-0.215826	5.73791e-05	0.000210917
TMEM40	-1.0902	0.000113878	0.000395497
KIF9	-0.169715	0.00332954	0.00841651
ARHGAP28	-0.132234	0.351199	0.464599
CRLS1	0.0937031	0.0504211	0.0922254
DEFB127	-0.162317	0.918987
PPP1R13B	-0.312462	3.63796e-06	1.65375e-05
ATRN	-0.151933	0.00538523	0.0129225
SMOX	-0.219823	0.019125	0.0397521
SIGLEC1	0.597794	4.68658e-06	2.0989e-05
FKBP1A	-0.219789	0.000162282	0.000547578
NSFL1C	-0.306412	6.76402e-11	6.74599e-10
SLC4A11	-0.944435	1.06062e-10	1.02181e-09
C20orf194	0.00185978	0.975542	0.983319
ZNF343	-0.0466909	0.337558	0.450219
EBF4	-0.277407	0.0804874	0.137697
CPXM1	-0.206384	0.218519	0.31807
MAVS	-0.279628	7.60902e-09	5.47861e-08
LZTS3	-0.346008	0.000187703	0.000625188
F11	0.596654	0.0236685	0.0478952
XRN2	0.113001	0.0377091	0.071872
KIZ	0.182292	0.0146552	0.0314526
DYNLL1	-0.217086	3.00667e-06	1.38584e-05
TESC	1.38999	2.30911e-13	3.38295e-12
SNX5	0.138241	0.00117311	0.00329087
RPL6	-0.0456438	0.427516	0.541472
SIRPG	1.04088	1.35224e-08	9.3639e-08
MAPKAPK5	0.0813918	0.0299489	0.0588681
P2RX7	-0.0679539	0.564784	0.668845
ESF1	0.370198	1.73294e-07	9.94511e-07
RBBP9	0.177701	0.0030152	0.00770991
ANAPC5	-0.113582	0.00541524	0.0129819
SLC23A2	-0.161825	0.0250843	0.0504153
SLC8B1	-0.159173	0.0171392	0.0361215
TMEM230	-0.0960755	0.0290229	0.0572576
DZANK1	0.00828559	0.898989	0.93073
KDM2B	-0.0334711	0.432146	0.545727
CFAP61	-2.24085	1.59753e-20	7.31321e-19
LHX5	-0.157305	0.554509	0.659657
TASP1	0.050431	0.367063	0.480814
OAS1	0.626444	4.2894e-07	2.30231e-06
GCN1	-0.389172	1.18231e-15	2.50249e-14
RPLP0	-0.269256	2.18398e-05	8.65732e-05
PXN	-0.100615	0.122717	0.197243
SIRT4	-0.165776	0.00535329	0.0128481
RPH3A	-0.768023	0.000706969	0.00208799
KIF16B	0.43663	4.59214e-09	3.43039e-08
TRMT6	0.0556518	0.34949	0.462764
CHGB	0.410619	0.0578514	0.103776
PEBP1	-0.45486	4.33565e-14	7.19173e-13
TBX5	1.00272	9.51412e-07	4.80053e-06
BRAP	-0.0529042	0.101158	0.167578
ERP29	-0.417032	4.0493e-13	5.71894e-12
NOS1	0.337798	0.103471	0.170809
FUS	-0.272152	1.85605e-09	1.47783e-08
IGBP1	-0.120147	0.0177151	0.0371487
FXYD5	-0.0531848	0.679724	0.76641
ZNF302	0.402585	8.02867e-07	4.10118e-06
GRAMD1A	-0.383393	1.68651e-10	1.57244e-09
FXYD3	-0.0975498	0.622203	0.718285
HEPH	0.708986	4.58561e-08	2.91007e-07
CDIP1	-0.945504	4.94673e-33	1.88565e-30
CMTM1	0.602975	6.76419e-10	5.76191e-09
KCNH4	-0.398997	0.00312819	0.00796494
GANAB	-0.172867	0.00205411	0.00545578
GMIP	-0.0593599	0.464715	0.576624
RBM41	0.524319	1.74965e-12	2.24986e-11
BIRC5	-0.21907	0.00458399	0.0112067
LAG3	0.898878	1.35221e-06	6.63863e-06
MLF2	-0.436816	1.03796e-14	1.89189e-13
OTUB2	-0.63729	1.50614e-10	1.4176e-09
DDX24	-0.213243	2.21483e-06	1.04504e-05
ZBTB25	0.283369	9.47198e-08	5.69641e-07
NECAP1	0.141942	0.00135002	0.00372729
ARHGAP4	0.602373	2.68615e-08	1.77099e-07
ANKRD24	0.518409	1.79985e-06	8.64366e-06
DHX32	-0.0568781	0.258673	0.3642
RCOR1	-0.067033	0.196554	0.291908
GPATCH2L	0.137898	0.0176186	0.0369895
LTBP4	-0.113149	0.231823	0.333528
BLVRB	-0.611854	1.74146e-15	3.60138e-14
SLC9A1	-0.468943	1.78787e-12	2.29528e-11
SPTLC1	0.0981592	0.0582221	0.104328
PAPOLA	0.131717	0.0054015	0.0129568
CCNK	-0.36904	1.20107e-12	1.58138e-11
PCBP4	-0.271351	0.0026735	0.00691785
RGS1	0.897495	1.24423e-07	7.32059e-07
YPEL3	-0.163027	0.0366586	0.0701059
MRPS33	-0.121662	0.0322466	0.0627489
NDUFB2	-0.205588	0.000687321	0.0020342
NUDC	-0.455843	1.21603e-16	3.01868e-15
MAEA	-0.446634	7.26421e-23	4.94815e-21
ICAM1	0.2961	0.00185076	0.00497165
STRN4	-0.373335	4.11117e-15	7.93879e-14
IRAK3	0.806339	4.01787e-10	3.54991e-09
LYZ	1.2041	1.38684e-13	2.10812e-12
SI	2.27232	5.65561e-07	2.96772e-06
MUL1	-0.445756	2.5564e-18	8.15332e-17
TFAP4	-0.359812	2.98269e-10	2.6801e-09
PDCD7	-0.11657	0.0043106	0.0106165
SPG21	-0.390421	7.01268e-18	2.09345e-16
FETUB	-0.501929	0.101389	0.16789
DNAJB11	0.0345835	0.486444	0.597156
P3H2	1.19344	5.84354e-11	5.8887e-10
THPO	0.146065	0.388986	0.503278
CHRD	0.299927	0.0193011	0.0400614
FLT3LG	0.456762	3.27058e-05	0.00012559
RAB11FIP3	-0.234889	1.06e-06	5.30456e-06
GNPTG	-0.136902	0.0312918	0.061131
ZNF268	0.359697	1.13626e-07	6.73631e-07
GOLGA3	-0.0497571	0.236239	0.33853
PABPC4	-0.432154	1.12617e-13	1.74058e-12
CD209	0.856803	3.21014e-10	2.87015e-09
CERS4	-0.639426	4.50706e-09	3.3707e-08
MCOLN1	-0.65121	1.23575e-20	5.76354e-19
USP48	-0.0386768	0.469196	0.580723
EFNB1	0.235946	0.00926514	0.0209698
PDPR	-0.236731	3.42589e-05	0.000130889
AARS1	-0.40732	3.91598e-10	3.46684e-09
GLG1	0.0422437	0.425701	0.539702
KIF4A	-0.105695	0.156585	0.242194
TNRC6A	0.194167	5.96824e-06	2.62399e-05
PLEKHG2	-0.128981	0.126614	0.202504
DLL3	-1.89611	7.06569e-23	4.82121e-21
NAT14	-0.548656	5.51017e-14	8.98211e-13
PITPNM2	-0.236954	0.00247529	0.00645636
EXOC1	0.204893	5.60119e-05	0.000206178
RBM27	0.358893	1.31409e-11	1.45763e-10
POU4F3	-0.16371	0.227479	0.328543
OSBPL8	0.519852	2.79145e-12	3.47236e-11
DTX2	-0.263865	1.29177e-05	5.35622e-05
NLRC4	0.862669	3.11241e-24	2.68235e-22
PUS7	0.0590014	0.367798	0.481666
LAMB4	0.0239192	0.881532	0.918582
NRCAM	0.309382	0.0869259	0.147256
LAMB1	0.375643	0.000108745	0.000379098
SLC26A4	0.853198	3.58984e-07	1.95167e-06
SLC26A3	0.0275462	0.854213	0.89807
DLD	0.056577	0.311805	0.422778
WDR7	0.112064	0.0254132	0.0509833
TXNL1	0.106853	0.014103	0.0304173
IL5RA	1.09105	1.86326e-09	1.48328e-08
ABCC6	-0.071522	0.513717	0.622579
CMTM6	0.40971	9.4112e-14	1.47879e-12
ITGA6	0.644014	9.19698e-08	5.54027e-07
RAPGEF4	0.371666	0.0209316	0.0429842
MAP3K20	0.583804	2.30969e-10	2.11175e-09
SMPX	0.202638	0.447166	0.560014
FH	-0.272988	2.28151e-06	1.07357e-05
SEL1L3	0.95882	1.43237e-11	1.57999e-10
TF	1.50038	1.4402e-09	1.16473e-08
CDV3	0.000344558	0.993087	0.994718
MYO15A	0.386462	0.000539146	0.00163234
ALKBH5	-0.239042	8.82723e-07	4.47502e-06
APOH	0.370628	0.421607	0.535625
NLRP1	0.888948	6.05641e-16	1.33463e-14
PITPNM3	-0.129639	0.374009	0.488058
SPAG7	-0.203326	0.000148755	0.000505508
ORC6	-0.0113533	0.885736	0.921606
ZFHX4	0.683975	3.16912e-05	0.000121989
SLC17A6	-0.924865	0.0718599	0.124855
CPA1	0.724408	0.00638859	0.0150389
ZC3HC1	-0.327735	2.04422e-12	2.60081e-11
ESR1	0.395847	0.000215595	0.000708066
RGS17	1.64882	1.5649e-25	1.6722e-23
ANGPT2	1.04988	2.52646e-12	3.16858e-11
TMEM101	-0.475232	4.58052e-21	2.28128e-19
CD200	0.612641	6.22019e-07	3.24039e-06
CCDC80	0.768935	2.63697e-09	2.05222e-08
CMA1	0.0313423	0.894548	0.927733
PSME1	0.0549407	0.425634	0.539652
PPP2R3C	0.129324	0.0123124	0.0269526
HAUS4	-0.237546	1.64834e-05	6.69674e-05
JPH4	-0.746072	7.93756e-05	0.000283774
MYH7	-0.621752	0.00181787	0.0048929
CEBPE	0.0733448	0.600384	0.69978
SLC7A8	-0.859054	5.70385e-12	6.71787e-11
OSGEP	-0.0769253	0.0934402	0.156751
SLC22A17	0.335881	0.0312485	0.0610615
RNF31	-0.436767	1.60508e-15	3.342e-14
SCFD1	0.216848	1.22969e-05	5.11596e-05
G2E3	0.355609	2.18333e-06	1.03141e-05
HECTD1	-0.00188914	0.972431	0.981143
HNRNPC	-0.072207	0.0331356	0.0642232
RPGRIP1	0.728131	7.22352e-17	1.87169e-15
SUPT16H	-0.172873	0.000262362	0.000846788
TOX4	-0.288279	1.5777e-12	2.042e-11
GEMIN2	0.111281	0.0318278	0.0620161
TGM1	-2.09467	1.92828e-22	1.22902e-20
TINF2	-0.161473	0.000335555	0.00105925
DAZL	1.00302	1.42696e-06	6.97797e-06
TBL1Y	-1.16618	0.00301784	0.00771617
SEMA6A	-1.26794	1.33627e-22	8.74178e-21
TRPM7	0.289144	0.000192354	0.000639041
TYRO3	-0.385347	1.25244e-05	5.20403e-05
WDR76	0.0850244	0.181789	0.273794
CAPN3	-0.736678	1.36807e-07	7.99231e-07
SNAP23	0.255861	4.36135e-06	1.96033e-05
TBX15	0.327927	0.00840471	0.0192588
PHGDH	-0.430452	0.0110825	0.0245559
COL9A3	1.09136	2.09838e-08	1.40711e-07
EZR	-0.206934	0.0236273	0.0478264
MYL6	-0.156189	0.00680529	0.015929
AGO1	-0.106497	0.0208582	0.042858
TEKT2	0.473908	0.00467666	0.0114016
CLSPN	-0.106624	0.244387	0.347893
RFFL	0.487502	9.79423e-14	1.53411e-12
UNC13D	-0.185098	0.183085	0.275434
MFSD11	0.0103236	0.834472	0.883619
DPYSL2	-0.0544597	0.572501	0.675614
TGFB2	0.563205	0.00112561	0.0031693
GPATCH2	0.265565	5.3398e-06	2.3687e-05
NUP50	0.0865044	0.145429	0.227547
CDC45	-0.237766	0.00360263	0.0090377
COMT	-0.317076	0.00013953	0.000476981
ADA2	0.207111	0.151657	0.235653
AC016026.1	0.187103	0.157315	0.243132
VNN3	0.616397	0.00282775	0.00727897
ECHDC1	0.263525	8.6167e-05	0.000306011
LRRFIP2	-0.0701826	0.177902	0.269014
[truncated: 54,494 more rows]
